# Supplementary material for: P(O)R2-directed Pd-catalyzed C–H functionalization of biaryl derivatives to synthesize chiral phosphorous ligands
Source: publisher site journal article supplement (doi:10.3762/bjoc.10.215), 2014-09-02
Supplement: Additional file 1 [file 1860-5397-10-215-S1.pdf]

## Supporting Information

for

# **P(O)R<sub>2</sub>-directed Pd-catalyzed C–H functionalization of biaryl derivatives to synthesize chiral phosphorous ligands**

Rong-Bin Hu,<sup>1</sup> Hong-Li Wang,<sup>1</sup> Hong-Yu Zhang,<sup>1</sup> Heng Zhang,<sup>1</sup> Yan-Na Ma<sup>1</sup> and Shang-dong Yang\*<sup>1, 2</sup>

Address: <sup>1</sup>State Key Laboratory of Applied Organic Chemistry, Lanzhou University, Lanzhou 730000, P. R. China and <sup>2</sup>State Key Laboratory for Oxo Synthesis and Selective Oxidation, Lanzhou Institute of Chemical Physics, Lanzhou 730000, P. R. China

Email: Shang-dong Yang - yangshd@lzu.edu.cn

\* Corresponding author

## **Experimental details, characterization data (<sup>1</sup>H, <sup>13</sup>C, <sup>31</sup>P spectra) of products**

### **Table of Contents**

|                                                                             |                |
|-----------------------------------------------------------------------------|----------------|
| <b>I . General methods and materials</b>                                    | <b>S2</b>      |
| <b>II . The synthesis route of chiral ligand L-1 and substrates</b>         | <b>S2–S3</b>   |
| <b>III. General procedures for the preparation of C–H functionalization</b> | <b>S3–S4</b>   |
| <b>IV. Characterization of the products</b>                                 | <b>S5–S10</b>  |
| <b>V . Copies of NMR and HPLC spectra charts</b>                            | <b>S11–S45</b> |

## I . General methods and materials

$^1\text{H}$  and  $^{13}\text{C}$  NMR spectra were recorded on a Bruker advance III 400 spectrometer (400 MHz for  $^1\text{H}$  and 100 MHz for  $^{13}\text{C}$ ) in  $\text{CDCl}_3$  with TMS as internal standard. Chemical shifts ( $\delta$ ) were measured in ppm relative to TMS  $\delta = 0$  for  $^1\text{H}$ , or to chloroform  $\delta = 77.0$  for  $^{13}\text{C}$  as internal standard.  $^{31}\text{P}$  NMR spectra and  $^{19}\text{F}$  NMR were recorded on the same instrument. Data are reported as follows: Chemical shift, multiplicity (s = singlet, d = doublet, dd = doublet of doublets, t = triplet, q = quartet, m = multiplet), Coupling constants,  $J$ , are reported in hertz. Mass data were measured with Thermo Scientific DSQ II mass spectrometer. The starting materials were purchased from Aldrich, Acros Organics, J&K Chemicals or TCI and used without further purification. Solvents were dried and purified according to the procedure from "Purification of Laboratory Chemicals book". Thin-layer chromatography (TLC) was performed using 60 mesh silica gel plates visualized with short-wavelength UV light (254 nm). Substrates were prepared according to corresponding literature. Enantioselectivities were determined by high performance liquid chromatography (HPLC, Waters-600-2996 or Agilent 1260) analysis employing a chiral column. Compound **2a** was described previously in *Org. Lett.* 2013, 15, 5302-5305, Compound **2b** was described previously in *Chem. Commun.*, 2014, 50, 4686-4689.

## II . The synthesis route of chiral ligand L-1 and substrates

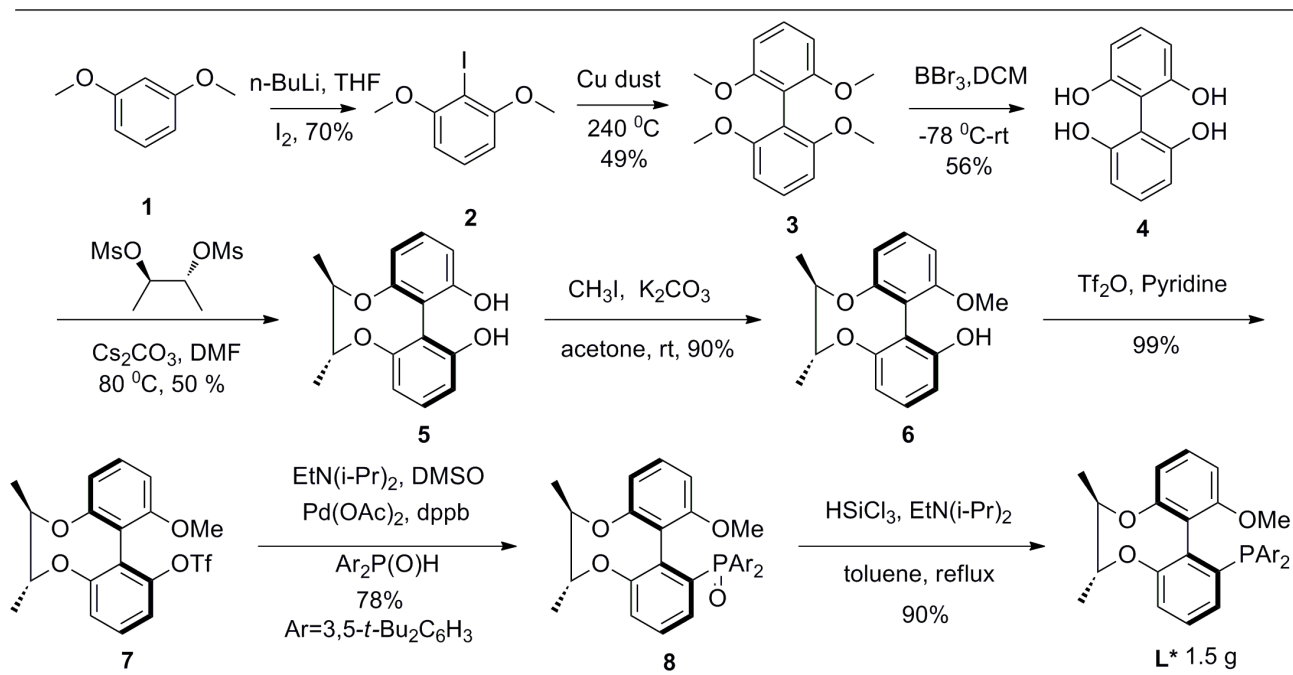

Detailed operations see following references: 1. Govender, S.; Mmutlane, E. M.; van Otterlo, W. A. L.; de Koning, C. B. *Org. Biomol. Chem.*, **2007**, 5, 2433–2440, doi: 10.1039/b707187f; 2. Kakei, H.; Tsuji, R.; Ohshima, T.; Morimoto, H.; Matsunaga, S.; Shibasaki, M. *Chem. Asian J.*, **2007**, 2, 257–264, doi: 10.1002/asia.200600309; 3. Wang, S. L.; Li, J. J.; Miao, T. T.; Wu, W. H.; Li, Q.; Zhuang, Y.; Zhou, Z. Y.; Qiu, L. Q. *Org. Lett.*, **2012**, 14, 1966-1969, doi: 10.1021/ol300721p.

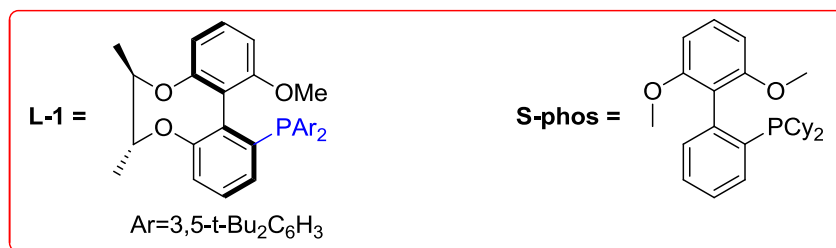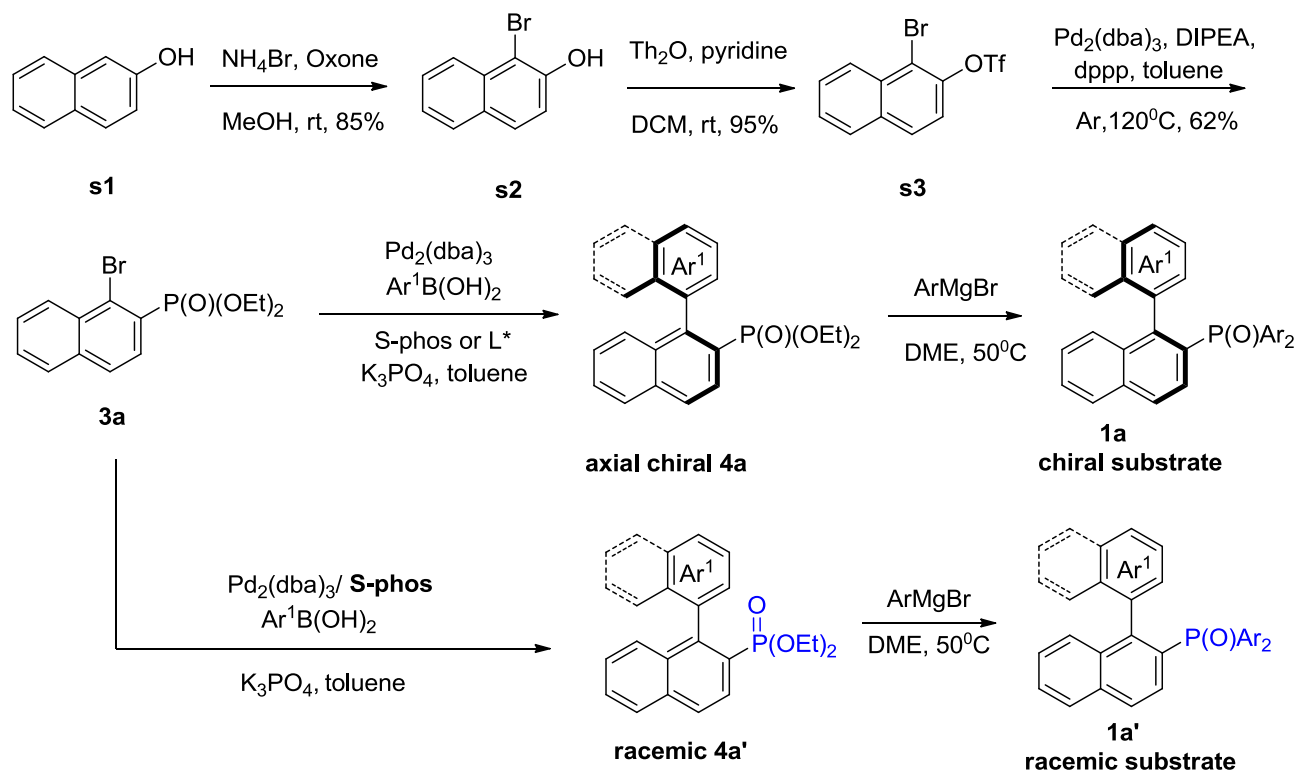

Detailed operations see following reference: Yin, J.; Buchwald, S. L. *J. Am. Chem. Soc.*, **2000**, *122*, 12051-12052, doi: 10.1021/ja005622z. 2. Wang, S. L.; Li, J. J.; Miao, T. T.; Wu, W. H.; Li, Q.; Zhuang, Y.; Zhou, Z. Y.; Qiu, L. Q. *Org. Lett.*, **2012**, *14*, 1966-1969, doi: 10.1021/ol300721p.

### III. General procedures for the preparation of C–H functionalization

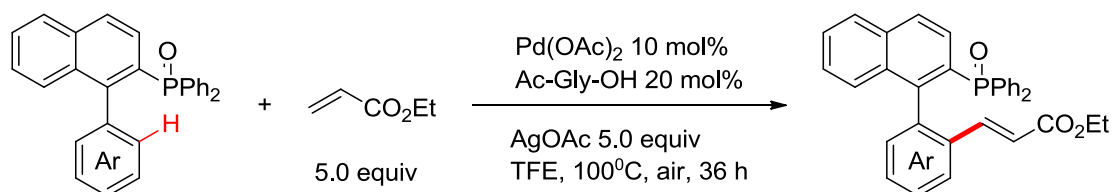

In a similar manner as described before [1]: Under air atmosphere, diarylphosphine oxide (0.30 mmol, 1 equiv), Pd(OAc)<sub>2</sub> (6.7 mg, 0.03 mmol, 10.0 mol %), Ac-Gly-OH (7.2 mg, 0.06 mmol, 20.0 mol %) and AgOAc (250.5 mg, 1.5 mmol, 5.0 equiv) were added to oven-dried reaction tube containing a magnetic stir bar. After sealed tube, a solution of ethyl acrylate (150.0, 1.5 mmol, 5.0 equiv) in 3.0 mL CF<sub>3</sub>CH<sub>2</sub>OH was added using a syringe. The mixture was stirred at 100°C in an oil bath until substrate disappeared as judged by TLC. After cooling to room temperature, the solution was removed in vacuo to yield a residue, which was purified by silica gel using (1:1 EtOAc/hexane) to afford the pure product as a oil.

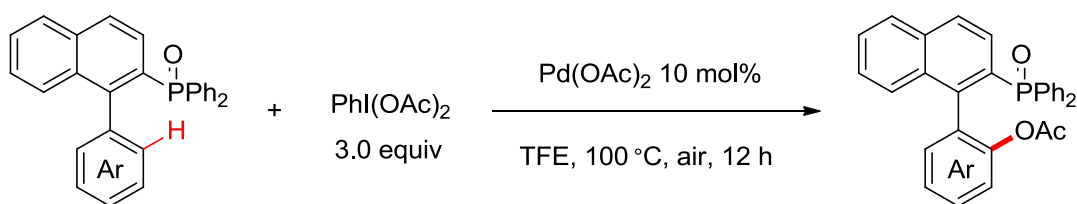

In a similar manner as described before [2]: Under air atmosphere, diarylphosphine oxide (0.30 mmol, 1.0 equiv), Pd(OAc)<sub>2</sub> (6.7 mg, 0.03 mmol, 10.0 mol %) and PhI(OAc)<sub>2</sub> (289 mg, 0.90 mmol, 3.0 equiv) were added to tube containing a magnetic stir bar. After sealed tube, 3.0 mL CF<sub>3</sub>CH<sub>2</sub>OH was added using a syringe. The mixture was stirred at 100 °C in an oil bath until substrate disappeared as judged by TLC. After cooling to room temperature, the solution was removed in vacuo to yield a residue, which was purified by silica gel using (1:1 EtOAc/hexane) to afford the pure product as an oil.

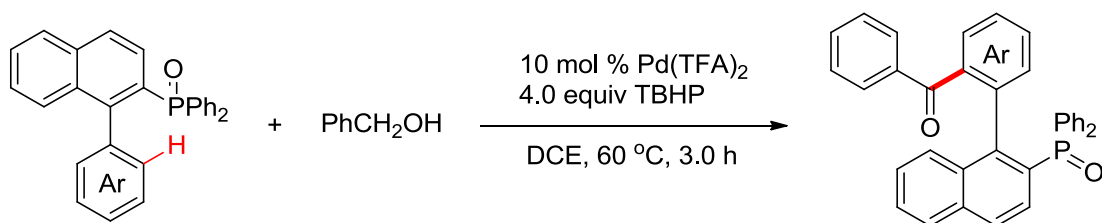

In a similar manner as described before [3]: Under air atmosphere, diarylphosphine oxide (0.20 mmol, 1.0 equiv) and Pd(TFA)<sub>2</sub> (6.6 mg, 0.02 mmol, 10 mol %) were added to a tube containing a magnetic stir bar. After which, 1.0 mL DCE was added using a syringe. Then 70 % aq. TBHP solution (110 μL, 0.80 mmol, 4.0 equiv) and benzyl alcohol 2'a (52 μL, 0.5 mmol, 2.5 equiv) were added with microsyringes. The reaction mixture was stirred at 60 °C in an oil bath for 20 hours until substrate disappeared as judged by TLC. After cooling to room temperature, the solution was removed in vacuo to yield a residue, which was purified by silica gel to afford the pure product as an oil.

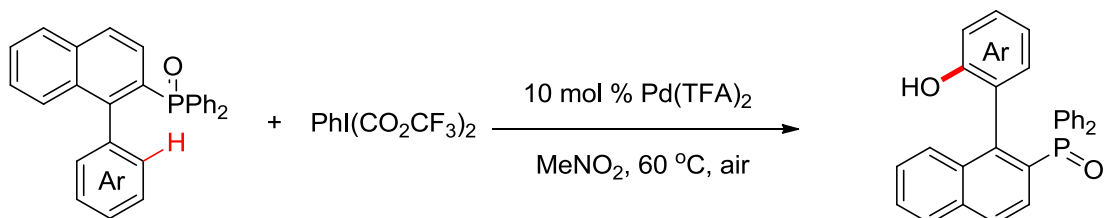

In a similar manner as described before [4]: Under air atmosphere, diarylphosphine oxide (0.30 mmol, 1.0 equiv), Pd(TFA)<sub>2</sub> (10.0 mg, 0.03 mmol, 10.0 mol %) and PhI(OTFA)<sub>2</sub> (193.5 mg, 0.45 mmol, 1.5 equiv) were added to tube containing a magnetic stir bar. After sealed tube, 2.0 mL CH<sub>3</sub>NO<sub>2</sub> was added using a syringe. The mixture was stirred at 60 °C in an oil bath until substrate disappeared as judged by TLC. After cooling to room temperature, the solution was removed in vacuo to yield a residue, which was purified by silica gel using (1:1 EtOAc/hexane) to afford the pure product as oil.

#### IV. Characterization of the products

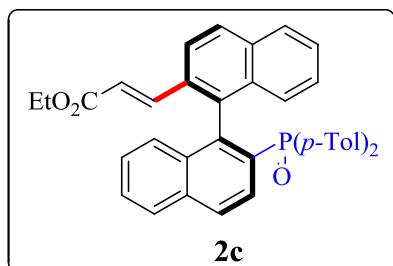

Yellow oil. <sup>1</sup>H NMR (400 MHz, CDCl<sub>3</sub>) δ: 8.04-8.00 (m, 1 H), 7.9,5-7.93 (m, 1 H), 7.90-7.85 (m, 1 H), 7.72-7.66 (m, 2 H), 7.59 (d, *J* = 8.8 Hz, 1 H), 7.53-7.50 (m, 1 H), 7.37-7.26 (m, 3 H), 7.23-.08 (m, 5 H), 7.02-7.00 (m, 2 H), 6.95 (t, *J* = 7.2 Hz, 2 H), 6.82 (m, 2 H), 6.19 (d, *J* = 15.9 Hz, 1 H), 4.09 (q, *J* = 7.2 Hz, 2 H), 2.29(s, 3 H), 2.23 (s, 3 H), 1.21 (t, *J* = 7.2 Hz, 3. H); <sup>13</sup>C NMR (100 MHz, CDCl<sub>3</sub>) δ: 166.51, 142.85, 141.46, 141.44, 141.07, 141.04, 140.93, 140.85, 137.05, 137.01, 134.50, 134.48, 133.68, 133.44, 133.22, 133.10, 131.82, 131.72, 131.50, 131.40, 131.35, 130.50, 130.35, 129.44, 129.32, 128.89, 128.74, 128.62, 128.27, 128.14, 128.08, 128.02, 127.64, 127.42, 127.22, 126.96, 126.58, 126.35, 122.16, 118.37, 60.10, 21.44, 21.36, 14.17; <sup>31</sup>P NMR (162 MHz, CDCl<sub>3</sub>) δ: 28.71; **MS (ESI):** found [M+Na]<sup>+</sup>603.21 ;[α]<sup>22</sup><sub>D</sub> = -29.0° (c = 1.0, CHCl<sub>3</sub>); Enantiomeric excess is 99% determined by HPLC (Chiralcel AD, Hexane/Isopropanol 90/10, flow rate = 1.0 mL/min, 232 nm): major isomer: t<sub>R</sub> = 115.72 min, an other isomer was not found.

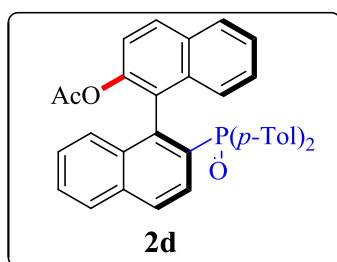

Yellow oil. <sup>1</sup>H NMR (400 MHz, CDCl<sub>3</sub>) δ: 8.01-7.93 (m, 2 H), 7.90 (d, *J* = 8.2 Hz, 1 H), 7.70 (d, *J* = 9.0 Hz, 1 H), 7.65 (d, *J* = 8.2 Hz, 1 H), 7.52 (t, *J* = 7.3 Hz, 1 H), 7.32-7.19 (m, 7 H), 7.13-7.08 (m, 2 H), 6.94-6.89 (m, 3 H), 6.86-6.83 (m, 2 H), 2.26 (s, 3 H), 2.24 (s, 3 H), 1.79 (s, 3 H); <sup>13</sup>C NMR (100 MHz, CDCl<sub>3</sub>) δ: 168.83, 146.95, 141.30, 141.27, 141.09, 141.06, 138.33, 138.25, 134.46, 134.44, 133.71, 132.72, 132.60, 131.64, 131.45, 131.02, 130.88, 130.39, 130.01, 129.71, 129.32, 129.04, 128.93, 128.82, 128.64, 128.49, 128.36, 128.19, 127.94, 127.70, 127.50, 127.28, 126.89, 126.37, 126.23, 125.67, 125.63, 125.15, 121.39, 115.63, 21.44, 21.40, 20.75; <sup>31</sup>P NMR (162 MHz, CDCl<sub>3</sub>) δ: 29.19; **MS (ESI):** found [M+H]<sup>+</sup> 541.19;[α]<sup>22</sup><sub>D</sub> = +58.0° (c = 1.0, CHCl<sub>3</sub>); Enantiomeric excess is 99% determined by HPLC (Chiralcel AD, Hexane/Isopropanol 85/15, flow rate = 1.0 mL/min, 230.8 nm): major isomer: t<sub>R</sub> = 51.69 min, an other isomer was not found.

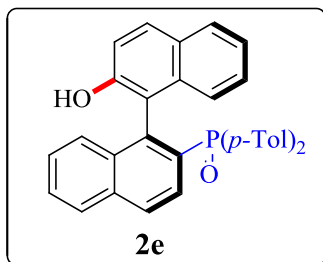

Yellow oil. <sup>1</sup>H NMR (400 MHz, CDCl<sub>3</sub>) δ: 7.93-7.89 (m, 2 H), 7.674-7.69 (m, 2 H), 7.62 (d, *J* = 8.8 Hz, 1 H), 7.5-7.45 (m, 3 H), 7.30-7.22 (m, 4 H), 7.17-7.02 (m, 4 H), 6.92 (t, *J* = 7.7 Hz, 1 H), 6.54-6.52 (m, 2 H), 6.43 (d, *J* = 8.4 Hz, 1 H), 2.41 (s, 3 H), 2.01 (s, 3 H); <sup>13</sup>C NMR (100 MHz, CDCl<sub>3</sub>) δ: 153.16, 142.83, 141.09, 141.01, 140.92, 135.17, 133.54, 133.39, 132.06, 131.97, 130.74, 130.32, 129.86, 129.75, 129.50, 129.37, 128.88, 128.44, 128.29, 128.23, 128.16, 128.10, 127.95, 127.91, 127.78, 127.45, 127.29, 126.38, 125.63, 125.55, 125.46, 124.36, 122.91, 121.70, 121.08, 21.60, 21.23; <sup>31</sup>P NMR (162 MHz, CDCl<sub>3</sub>) δ: 33.26; **MS (ESI):** found [M+H]<sup>+</sup> 499.19; [α]<sub>D</sub><sup>22</sup> = +45.0° (c = 1.0, CHCl<sub>3</sub>); Enantiomeric excess is 99% determined by HPLC (Chiralcel AD, Hexane/Isopropanol 85/15, flow rate = 1.0 mL/min, 236.7 nm): major isomer: t<sub>R</sub> = 22.35 min, an other isomer was not found.

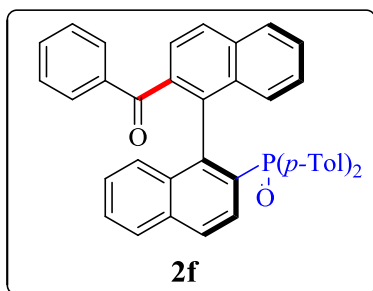

Yellow oil. <sup>1</sup>H NMR (400 MHz, CDCl<sub>3</sub>) δ: 7.87-7.83 (m, 4 H), 7.72 (d, *J* = 7.5 Hz, 2 H), 7.53 (d, *J* = 8.6 Hz, 1 H), 7.50-7.42 (m, 3 H), 7.36 (t, *J* = 7.4 Hz, 1 H), 7.32-7.24 (m, 4 H), 7.23-7.19 (m, 2 H), 7.16-7.09 (m, 3 H), 7.0-7.01 (m, 3 H), 6.79-6.77 (m, 2 H), 2.28 (s, 3 H), 2.16 (s, 3 H); <sup>13</sup>C NMR (100 MHz, CDCl<sub>3</sub>) δ: 196.95, 143.15, 143.08, 141.31, 141.28, 141.23, 141.20, 137.76, 137.48, 137.43, 135.79, 134.54, 134.42, 133.84, 133.71, 131.80, 131.77, 131.70, 131.67, 131.02, 130.68, 130.24, 129.97, 129.18, 128.67, 128.55, 128.41, 128.28, 127.91, 127.84, 127.75, 127.65, 127.63, 127.57, 127.51, 127.30, 127.18, 127.04, 126.86, 126.67, 126.28, 126.18, 21.44, 21.32; <sup>31</sup>P NMR (162 MHz, CDCl<sub>3</sub>) δ: 29.05; **MS (ESI):** found [M+H]<sup>+</sup> 587.22; [α]<sub>D</sub><sup>22</sup> = +65.0° (c = 1.0, CHCl<sub>3</sub>); Enantiomeric excess is 99% determined by HPLC (Chiralcel AD, Hexane/Isopropanol 90/10, flow rate = 1.0 mL/min, 233.2 nm): major isomer: t<sub>R</sub> = 9.32 min, an other isomer was not found.

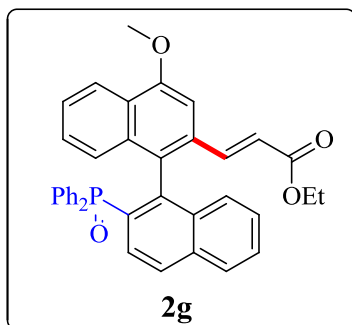

White oil.  $^1\text{H NMR}$  (400 MHz,  $\text{CDCl}_3$ )  $\delta$ : 8.08-8.01 (m, 2 H), 7.94 (d,  $J = 8.2$  Hz, 1 H), 7.8,9-7.84 (m, 1 H), 7.54-7.51 (m, 1 H), 7.42-7.38 (m, 2 H), 7.36-7.30 (m, 2 H), 7.27-7.17 (m, 7 H), 7.13-7.01 (m, 4 H), 6.88 (d,  $J = 8.4$  Hz, 1 H), 6.82 (s, 1 H), 6.21 (d,  $J = 15.8$  Hz, 1 H), 4.11 (q,  $J = 7.1$  Hz, 2 H), 4.02 (s, 3 H), 1.21 (t,  $J = 7.1$  Hz, 3 H);  $^{13}\text{C NMR}$  (100 MHz,  $\text{CDCl}_3$ )  $\delta$ : 166.47, 155.55, 143.29, 141.24, 141.16, 134.59, 134.57, 134.51, 133.67, 133.65, 133.56, 132.85, 132.62, 131.81, 131.74, 131.64, 131.53, 131.45, 131.35, 131.03, 131.00, 130.62, 130.59, 130.52, 129.97, 129.93, 128.91, 128.80, 128.29, 128.17, 128.10, 128.07, 127.89, 127.77, 127.54, 127.40, 127.30, 127.28, 127.24, 127.17, 126.92, 126.11, 121.69, 118.22, 99.51, 60.14, 55.31, 14.17;  $^{31}\text{P NMR}$  (162 MHz,  $\text{CDCl}_3$ )  $\delta$ : 28.60; **MS (ESI)**: found  $[\text{M}+\text{H}]^+$  583.20;  $[\alpha]_{\text{D}}^{22} = -22.0^\circ$  ( $c = 0.5$ ,  $\text{CHCl}_3$ ); Enantiomeric excess is 98% determined by HPLC (Chiralcel AD, Hexane/Isopropanol 85/15, flow rate = 1.0 mL/min, 209.7 nm): major isomer:  $t_{\text{R}} = 16.26$  min.

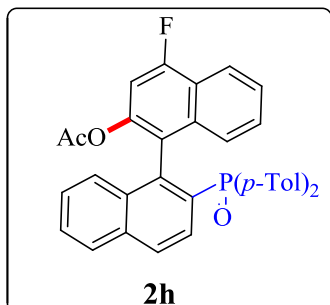

Yellow oil.  $^1\text{H NMR}$  (400 MHz,  $\text{CDCl}_3$ )  $\delta$ : 8.02-7.89 (m, 4 H), 7.55-7.51 (m, 1 H), 7.39-7.35 (m, 1 H), 7.30-7.23 (m, 5 H), 7.18-7.12 (m, 2 H), 6.98-6.89 (m, 6 H), 2.27 (s, 3 H), 1.80 (s, 3 H);  $^{13}\text{C NMR}$  (100 MHz,  $\text{CDCl}_3$ )  $\delta$ : 168.44, 160.00, 157.48, 146.35, 146.24, 141.41, 141.38, 141.30, 141.27, 137.53, 137.45, 134.52, 134.50, 134.30, 134.25, 132.84, 132.73, 131.77, 131.60, 131.53, 131.49, 131.43, 130.76, 130.49, 129.86, 129.43, 129.05, 128.94, 128.80, 128.49, 128.36, 128.26, 128.22, 128.14, 128.10, 127.82, 127.36, 127.10, 127.02, 126.30, 126.27, 125.46, 121.87, 121.82, 121.48, 121.32, 120.31, 120.26, 106.32, 106.08, 21.41, 20.70;  $^{31}\text{P NMR}$  (162 MHz,  $\text{CDCl}_3$ )  $\delta$ : 28.65;  $^{19}\text{F NMR}$  (376 MHz,  $\text{CDCl}_3$ )  $\delta$ : (d, -120.51); **MS (ESI)**: found  $[\text{M}+\text{H}]^+$  559.20;  $[\alpha]_{\text{D}}^{22} = -15.0^\circ$  ( $c = 0.2$ ,  $\text{CHCl}_3$ ); Enantiomeric excess is 99% determined by HPLC (Chiralcel AD, Hexane/Isopropanol 85/15, flow rate = 1.0 mL/min, 233.2 nm): major isomer:  $t_{\text{R}} = 30.50$  min, an other isomer was not found.

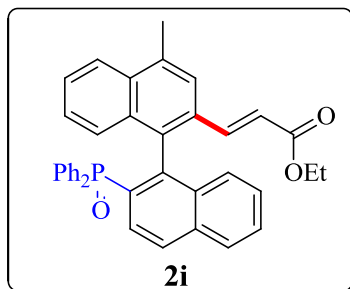

Yellow oil.  $^1\text{H NMR}$  (400 MHz,  $\text{CDCl}_3$ )  $\delta$ : 8.05-8.02 (m, 1 H), 7.94 (d,  $J=8.2$  Hz, 1 H), 7.90-7.85(m, 1 H), 7.79 (d,  $J=8.4$  Hz, 1 H), 7.53 (t,  $J=7.8$  Hz, 1 H), 7.43-7.32 (m, 5 H), 7.26-7.16 (m, 7 H), 7.12 (t,  $J=7.8$  Hz, 1 H), 7.04-6.97 (m, 4 H), 6.23 (d,  $J=15.9$  Hz, 1 H), 4.10 (q,  $J=7.1$  Hz, 2 H), 2.63 (s, 3 H), 1.22 (t,  $J=7.3$  Hz, 3 H);  $^{13}\text{C NMR}$  (100 MHz,  $\text{CDCl}_3$ )  $\delta$ : 166.55, 142.87, 141.32, 141.23, 135.44, 135.39, 135.14, 134.57, 134.55, 133.75, 133.39, 133.28, 132.86, 132.74, 132.70, 131.84, 131.74, 131.66, 131.45, 131.35, 131.21, 131.13, 131.06, 131.03, 130.38, 130.35, 130.20, 128.91, 128.80, 128.33, 128.21, 128.18, 128.15, 128.09, 127.94, 127.82, 127.37, 127.28, 127.25, 127.17, 126.57, 126.13, 123.80, 122.81, 118.44, 60.10, 19.62, 14.19;  $^{31}\text{P NMR}$  (162 MHz,  $\text{CDCl}_3$ )  $\delta$ : 28.71; **MS (ESI)**: found  $[\text{M}+\text{H}]^+$  567.21;  $[\alpha]_{\text{D}}^{22} = -45.0^\circ$  ( $c = 0.2$ ,  $\text{CHCl}_3$ ); We tried to obtain the enantiomeric excess, but didn't find the corresponding condition.

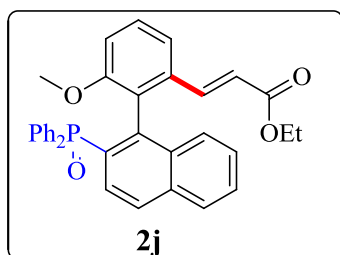

Yellow oil.  $^1\text{H NMR}$  (400 MHz,  $\text{CDCl}_3$ )  $\delta$ : 7.87 (d,  $J=8.3$  Hz, 2 H), 7.61-7.50 (m, 6 H), 7.41-37 (m, 2 H), 7.33-7.17 (m, 8 H), 6.92 (d,  $J=15.9$  Hz, 1 H), 6.71 (d,  $J=8.1$  Hz, 1 H), 6.04 (d,  $J=15.9$  Hz, 1 H), 4.03 (q,  $J=7.2$  Hz, 2 H), 3.36 (s, 3 H), 1.16 (t,  $J=7.2$  Hz, 3 H);  $^{13}\text{C NMR}$  (100 MHz,  $\text{CDCl}_3$ )  $\delta$ : 166.47, 155.55, 143.29, 141.24, 141.16, 134.59, 134.57, 134.51, 133.67, 133.65, 133.56, 132.85, 132.62, 131.81, 131.74, 131.64, 131.53, 131.45, 131.35, 131.03, 131.00, 130.62, 130.59, 130.52, 129.97, 129.93, 128.91, 128.80, 128.29, 128.17, 128.10, 128.07, 127.89, 127.77, 127.54, 127.40, 127.30, 127.28, 127.24, 127.17, 126.92, 126.11, 121.69, 118.22, 99.51, 60.14, 55.31, 14.17;  $^{31}\text{P NMR}$  (162 MHz,  $\text{CDCl}_3$ )  $\delta$ : 28.11; **MS (ESI)**: found  $[\text{M}+\text{H}]^+$  533.20;  $[\alpha]_{\text{D}}^{22} = -20.0^\circ$  ( $c = 0.2$ ,  $\text{CHCl}_3$ ); Enantiomeric excess is 74% determined by HPLC (Chiralcel AD-H, Hexane/Isopropanol 90/10, flow rate = 1.0 mL/min, 235.1 nm): major isomer:  $t_{\text{R}} = 37.82$  min, minor isomer:  $t_{\text{R}} = 41.51$  min.



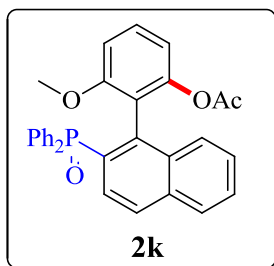

Yellow oil.  $^1\text{H NMR}$  (400 MHz,  $\text{CDCl}_3$ )  $\delta$ : 7.87-7.84 (m, 2 H), 7.68-7.61 (m, 3 H), 7.55-7.50 (m, 3 H), 7.47-7.33 (m, 6 H), 7.31-7.21 (m, 3 H), 6.73 (d,  $J = 8.2$  Hz, 1 H), 6.48 (d,  $J = 8.3$  Hz, 1 H), 3.34 (s, 3 H), 1.62 (s, 3 H);  $^{13}\text{C NMR}$  (100 MHz,  $\text{CDCl}_3$ )  $\delta$ : 168.53, 157.95, 149.66, 138.14, 138.06, 134.40, 134.38, 134.15, 133.94, 133.12, 132.90, 132.65, 132.54, 132.11, 132.01, 131.87, 131.78, 131.18, 131.15, 131.01, 130.98, 129.57, 129.29, 128.55, 128.43, 128.26, 127.96, 127.92, 127.84, 127.81, 127.69, 127.66, 127.42, 127.30, 126.75, 126.69, 119.11, 119.07, 114.61, 107.15, 55.07, 20.57;  $^{31}\text{P NMR}$  (162 MHz,  $\text{CDCl}_3$ )  $\delta$ : 28.39;  $^{19}\text{F NMR}$  (376 MHz,  $\text{CDCl}_3$ )  $\delta$ : (d, -120.51); **MS (ESI)**: found  $[\text{M}+\text{H}]^+$  493.17;  $[\alpha]_{\text{D}}^{22} = -10.0^\circ$  ( $c = 0.2$ ,  $\text{CHCl}_3$ ); Enantiomeric excess is 78% determined by HPLC (Chiralcel AD, Hexane/Isopropanol 85/15, flow rate = 1.0 mL/min, 236.7nm): major isomer:  $t_{\text{R}} = 24.14$  min, minor isomer:  $t_{\text{R}} = 19.63$  min.

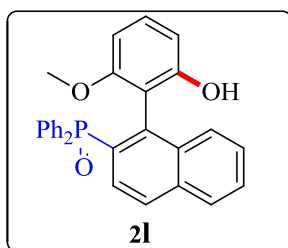

Yellow oil.  $^1\text{H NMR}$  (400 MHz,  $\text{CDCl}_3$ )  $\delta$ : 9.00 (b, 1 H), 7.80-7.68 (m, 4 H), 7.53-7.41 (m, 5 H), 7.38-7.28 (m, 5 H), 7.21-7.16 (m, 2 H), 7.10 (d,  $J = 2.9$  Hz, 1 H), 6.69 (dd,  $J_1 = 8.8$  Hz,  $J_2 = 3.0$  Hz, 1 H), 6.17 (d,  $J = 8.9$  Hz, 1 H), 3.20 (s, 3 H);  $^{13}\text{C NMR}$  (100 MHz,  $\text{CDCl}_3$ )  $\delta$ : 150.22, 149.46, 144.48, 144.40, 134.47, 133.64, 132.89, 132.77, 132.68, 132.61, 132.15, 132.06, 131.63, 131.30, 130.79, 130.69, 130.47, 129.03, 128.50, 128.37, 128.33, 128.21, 127.98, 127.83, 127.78, 127.63, 127.50, 127.05, 126.92, 126.46, 125.48, 125.42, 121.30, 116.45, 109.68, 54.40;  $^{31}\text{P NMR}$  (162 MHz,  $\text{CDCl}_3$ )  $\delta$ : 28.39; **MS (ESI)**: found  $[\text{M}+\text{H}]^+$  451.16;  $[\alpha]_{\text{D}}^{22} = -20.0^\circ$  ( $c = 0.2$ ,  $\text{CHCl}_3$ ); Enantiomeric excess is 64% determined by HPLC (Chiralcel OD-H, Hexane/Isopropanol 95/5, flow rate = 0.5 mL/min, 237.9 nm): major isomer:  $t_{\text{R}} = 19.21$  min, minor isomer:  $t_{\text{R}} = 15.93$  min.

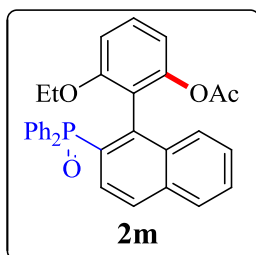

Yellow oil.  $^1\text{H NMR}$  (400 MHz,  $\text{CDCl}_3$ )  $\delta$ : 7.87-7.83 (m, 2 H), 7.66-7.61 (m, 3 H), 7.55-7.45 (m, 4 H), 7.41-7.34 (m, 5 H), 7.31-7.26 (m, 2 H), 7.20 (t,  $J = 8.2$  Hz, 1 H), 6.68 (d,  $J = 8.2$  Hz, 1 H), 6.47 (d,  $J = 8.4$  Hz, 1 H),

3.75-3.59 (m, 2 H), 1.60 (s, 3 H), 0.94 (t,  $J = 6.9$  Hz, 3 H);  $^{13}\text{C}$  NMR (100 MHz,  $\text{CDCl}_3$ )  $\delta$ : 168.53, 157.37, 149.68, 138.62, 138.55, 134.46, 134.44, 133.19, 133.01, 132.66, 132.54, 132.15, 132.05, 131.89, 131.79, 131.49, 131.47, 131.35, 131.32, 129.61, 128.45, 128.34, 128.22, 128.07, 128.05, 127.95, 127.89, 127.77, 127.57, 127.47, 127.34, 127.17, 126.92, 126.63, 119.14, 119.09, 114.41, 108.05, 63.31, 20.45, 14.28;  $^{31}\text{P}$  NMR (162 MHz,  $\text{CDCl}_3$ )  $\delta$ : 30.53; **MS (ESI)**: found  $[\text{M}+\text{H}]^+$  507.19;  $[\alpha]_{\text{D}}^{22} = -45.0^\circ$  ( $c = 0.2$ ,  $\text{CHCl}_3$ ); Enantiomeric excess is 90% determined by HPLC (Chiralcel AD, Hexane/Isopropanol 85/15, flow rate = 1.0 mL/min, 236.7 nm): major isomer:  $t_{\text{R}} = 22.26$  min, minor isomer:  $t_{\text{R}} = 13.38$  min.

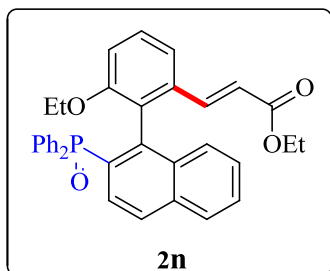

Yellow oil.  $^1\text{H}$  NMR (400 MHz,  $\text{CDCl}_3$ )  $\delta$ : 7.87 (d,  $J = 8.0$  Hz, 2 H), 7.60-7.50 (m, 6 H), 7.43-7.22 (m, 9 H), 7.16 (d,  $J = 7.8$  Hz, 1 H), 6.92 (d,  $J = 15.9$  Hz, 1 H), 6.69 (d,  $J = 8.1$  Hz, 1 H), 6.03 (d,  $J = 15.9$  Hz, 1 H), 4.03 (q,  $J = 7.0$  Hz, 2 H), 3.77-3.64 (m, 2 H), 1.17 (t,  $J = 7.3$  Hz, 3 H), 0.92 (t,  $J = 7.2$  Hz, 3 H);  $^{13}\text{C}$  NMR (100 MHz,  $\text{CDCl}_3$ )  $\delta$ : 166.44, 157.16, 142.62, 140.88, 140.81, 135.30, 134.43, 134.41, 134.11, 133.64, 133.10, 133.07, 132.99, 132.62, 132.00, 131.91, 131.86, 131.76, 131.08, 131.05, 129.33, 128.49, 128.37, 128.28, 127.97, 127.93, 127.91, 127.85, 127.79, 127.77, 127.51, 127.47, 127.42, 127.30, 126.80, 126.38, 118.43, 117.41, 112.08, 63.27, 59.90, 14.35, 14.10;  $^{31}\text{P}$  NMR (162 MHz,  $\text{CDCl}_3$ )  $\delta$ : 28.09; **MS (ESI)**: found  $[\text{M}+\text{H}]^+$  547.17;  $[\alpha]_{\text{D}}^{22} = -25.0^\circ$  ( $c = 0.2$ ,  $\text{CHCl}_3$ ); Enantiomeric excess is 90% determined by HPLC (Chiralcel IC-3, Agilent 1260, Hexane/Isopropanol 85/15, flow rate = 1.0 mL/min, 240 nm): major isomer:  $t_{\text{R}} = 36.627$  min, minor isomer:  $t_{\text{R}} = 30.10$  min.

#### Reference

1. Wang, H.-L., Hu, R.-B.; Zhang, H.; Zhou, A.-X.; Yang, S.-D. *Org. Lett.*, **2013**, *15*, 5302-5305, doi:10.1021/ol402577p.
2. Zhang, H.; Hu, R.-B.; Zhang, X.-Y.; Li, S.-X.; Yang, S.-D. *Chem. Commun.*, **2014**, *50*, 4686-4689, doi:10.1039/C4CC01238K.
3. Ma, Y.-N., Tian, Q.-P., Zhang, H.-Y.; Zhou, A.-X.; Yang, S.-D. *Org. Chem. Front.*, **2014**, *1*, 284-288, doi:10.1039/C4QO00005F.
4. Zhang, H.-Y.; Yi, H.-M.; Wang, G.-W.; Yang, B.; Yang, S.-D. *Org. Lett.*, **2013**, *15*, 6186-6189, doi:10.1021/ol403028a.

## V. Copies of NMR and HPLC spectra charts

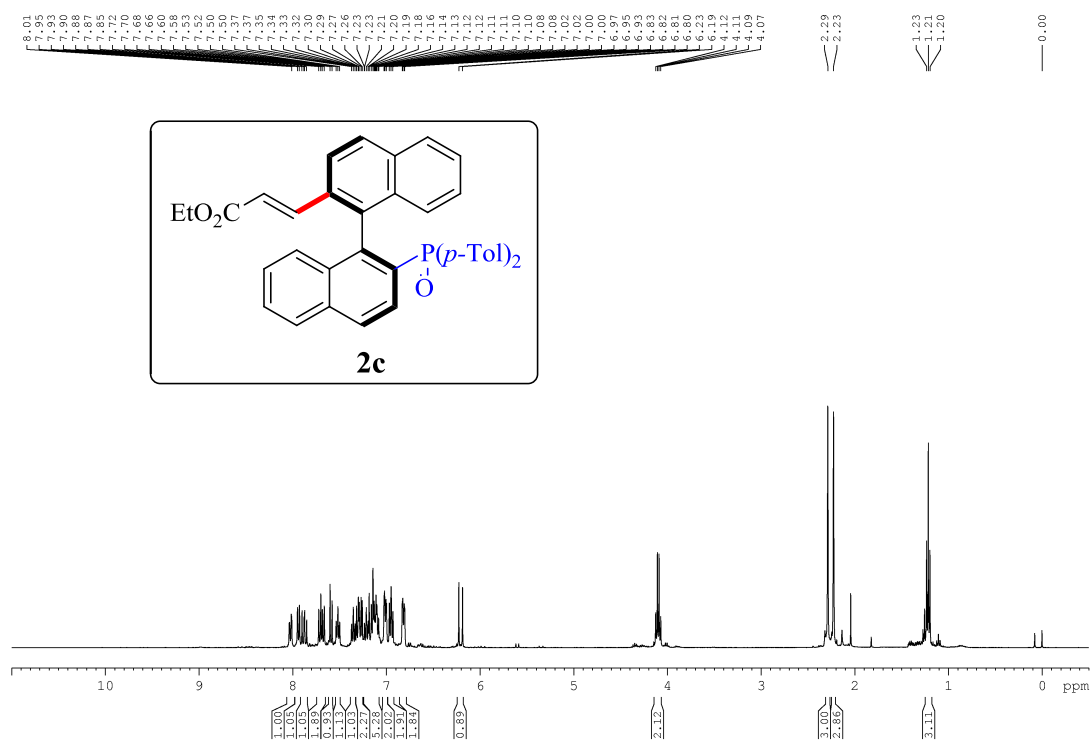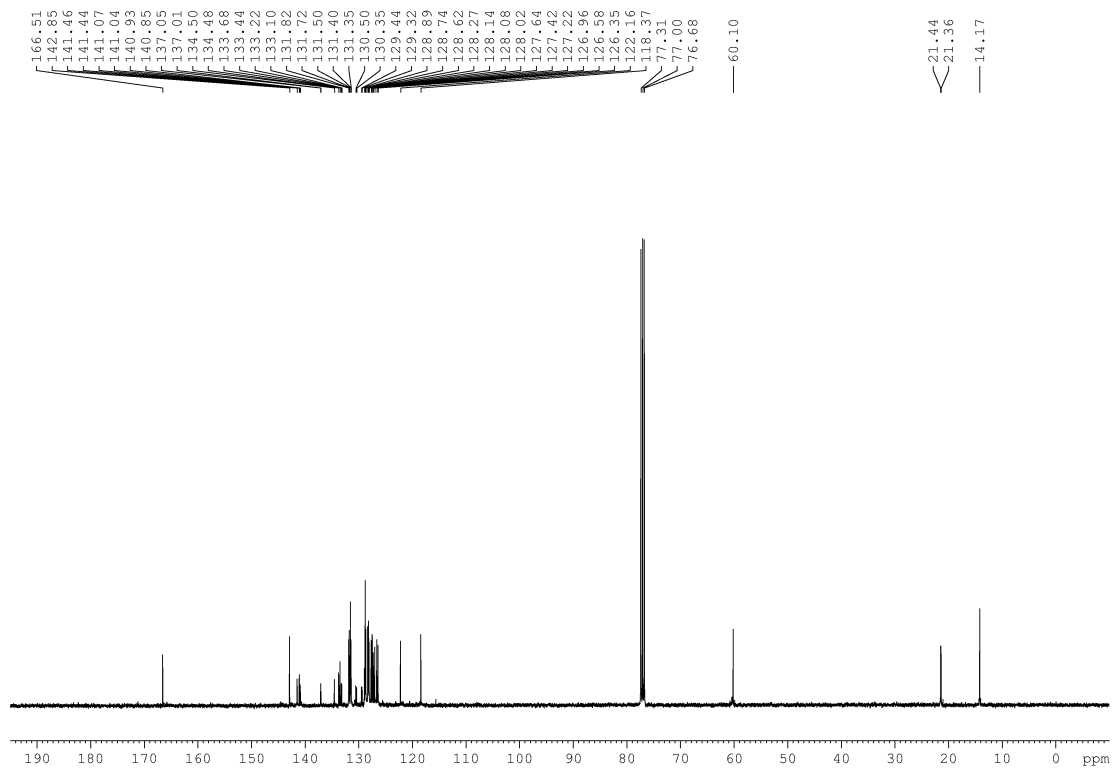

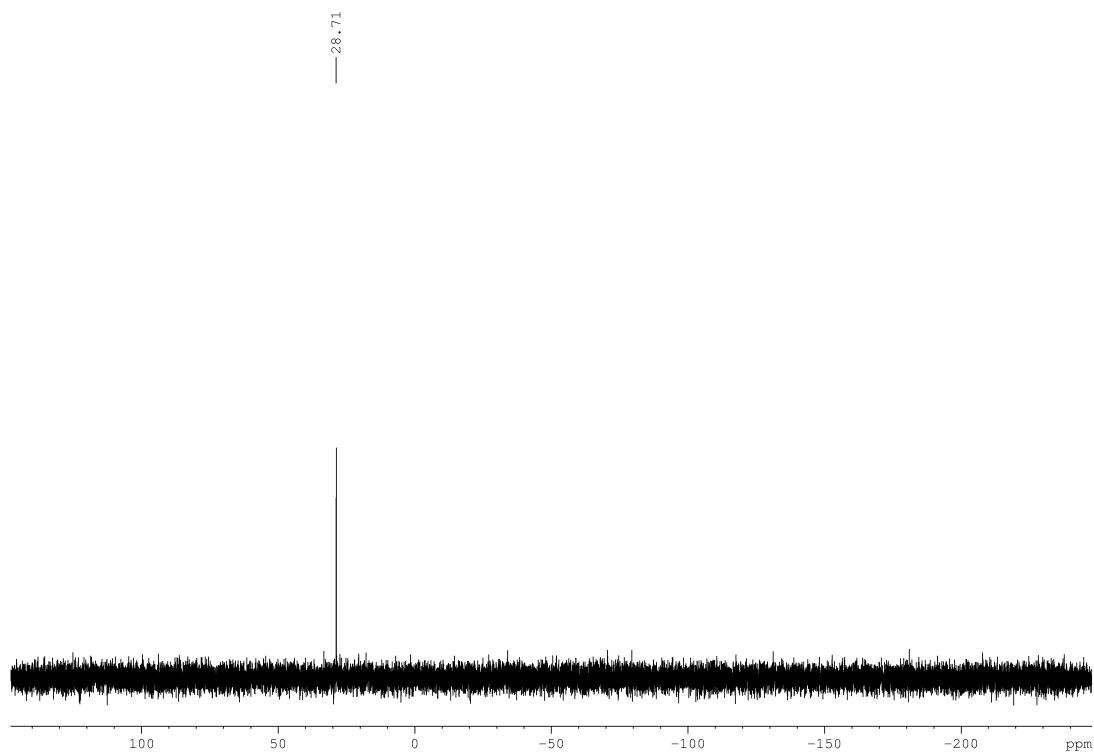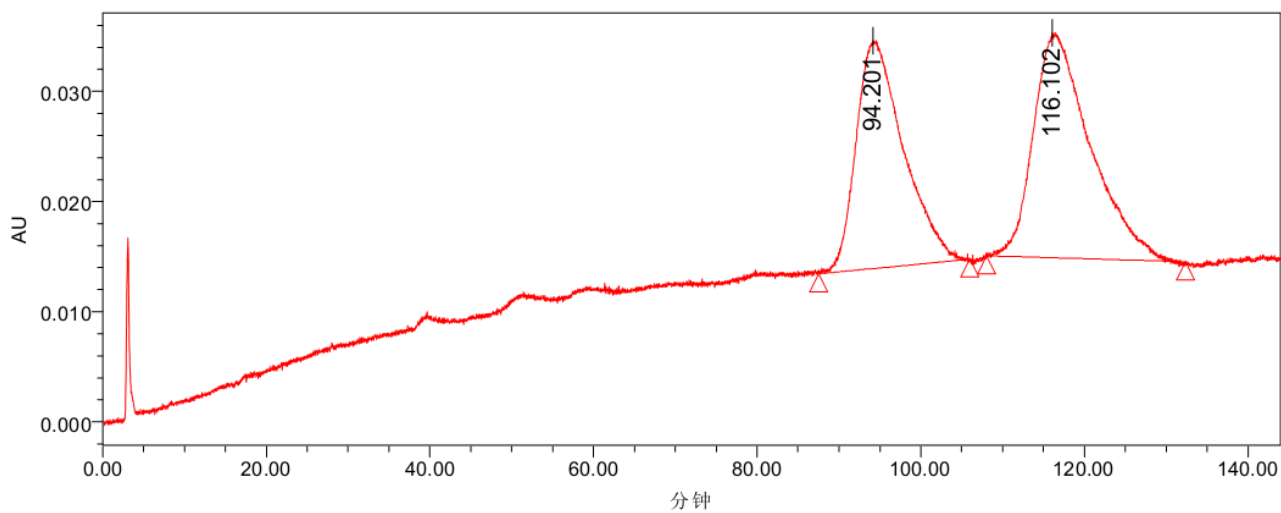

处理通道: PDA 232.0 纳米

|   | 处理通道         | 保留时间<br>(分钟) | 面积      | % 面积  | 峰高    |
|---|--------------|--------------|---------|-------|-------|
| 1 | PDA 232.0 纳米 | 94.201       | 8307715 | 45.63 | 20770 |
| 2 | PDA 232.0 纳米 | 116.102      | 9900071 | 54.37 | 20338 |

Processing channel: PDA 232.0nm

|   | Processing channel | Retention time (minute) | Area    | Area % | Peak height |
|---|--------------------|-------------------------|---------|--------|-------------|
| 1 | PDA 232.0 nm       | 94.201                  | 8307715 | 45.63  | 20770       |
| 2 | PDA 232.0 nm       | 116.102                 | 9900071 | 54.37  | 20338       |

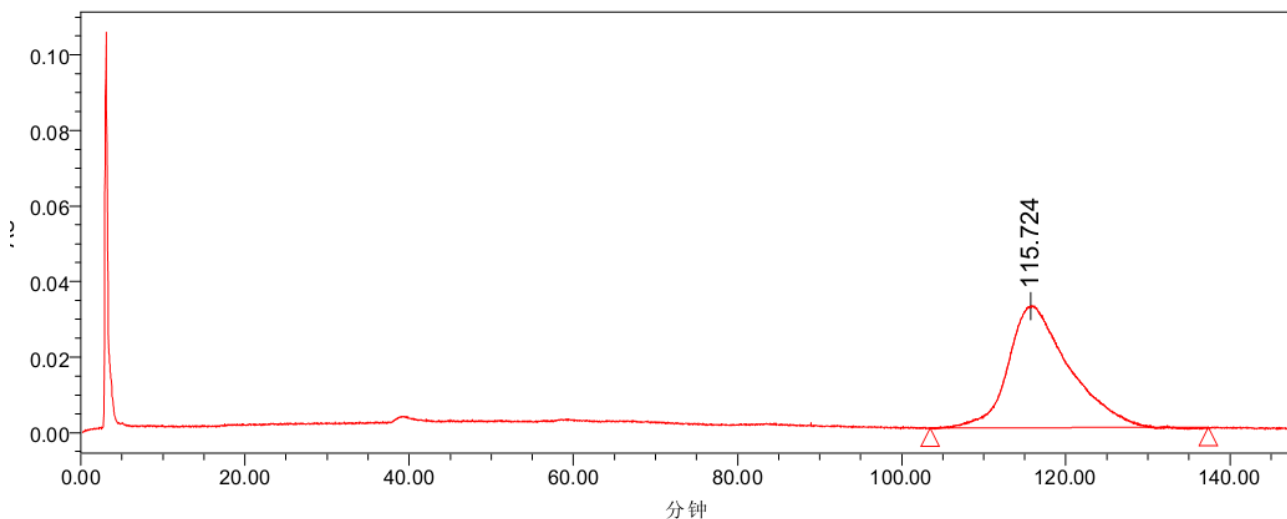

处理通道: PDA 232.0 纳米

|   | 处理通道         | 保留时间 (分钟) | 面积       | % 面积   | 峰高    |
|---|--------------|-----------|----------|--------|-------|
| 1 | PDA 232.0 纳米 | 115.724   | 16693790 | 100.00 | 32195 |

Processing channel: PDA 232.0nm

|   | Processing channel | Retention time (minute) | Area     | Area % | Peak height |
|---|--------------------|-------------------------|----------|--------|-------------|
| 1 | PDA 232.0nm        | 115.724                 | 16693790 | 100.00 | 32195       |

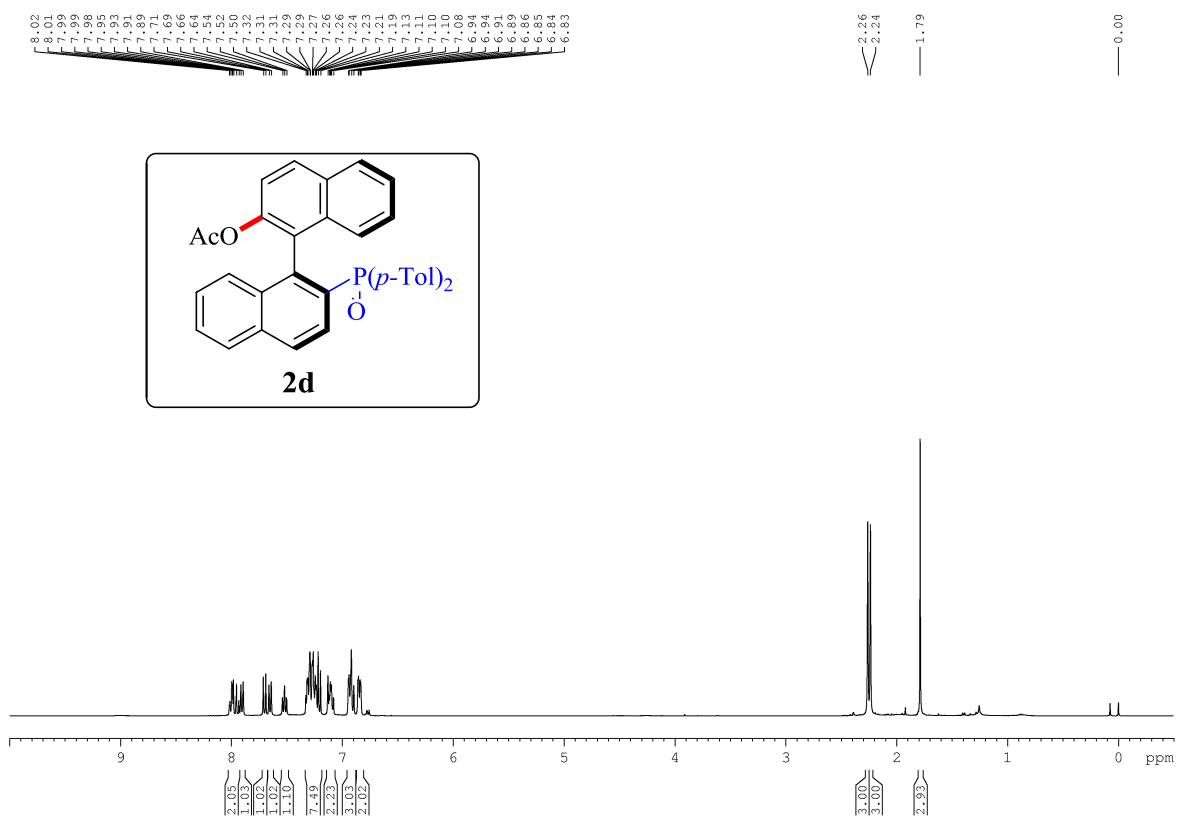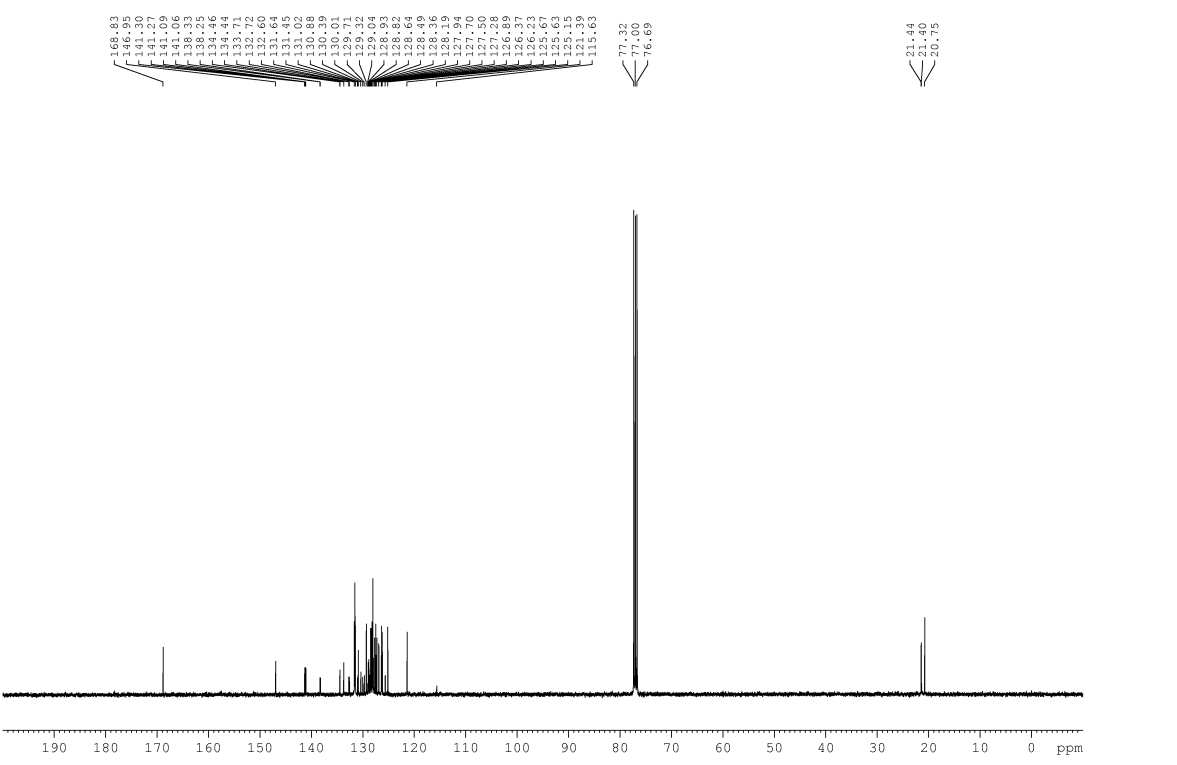

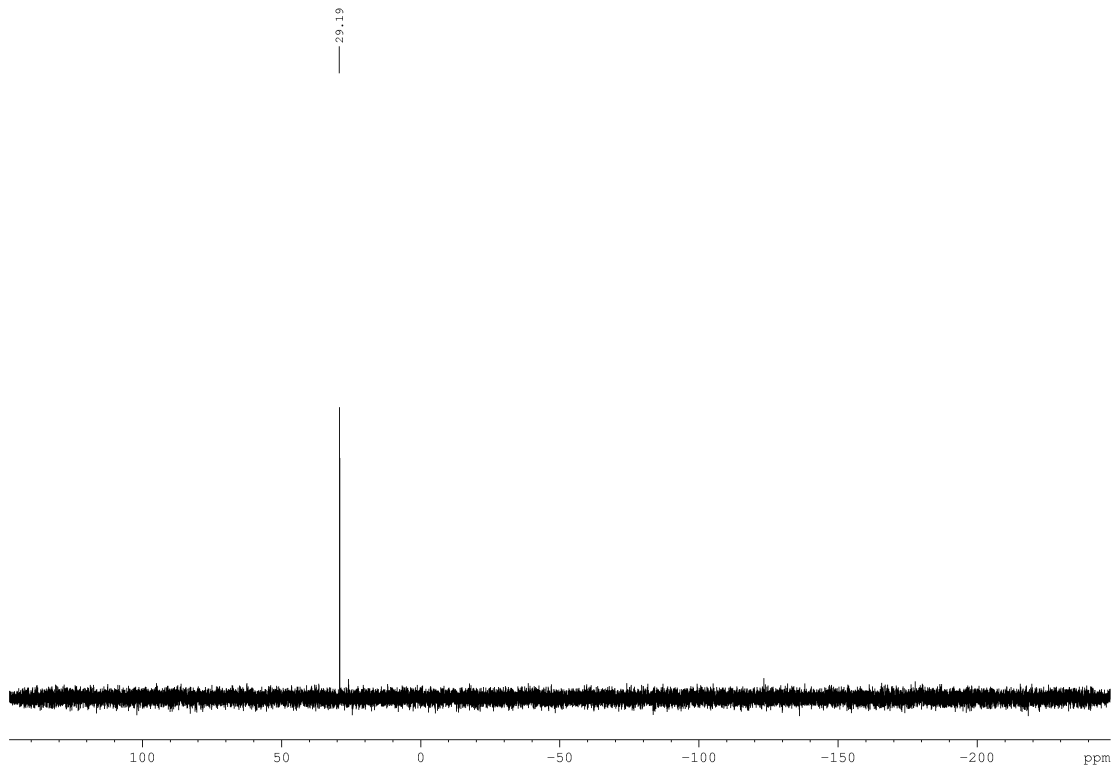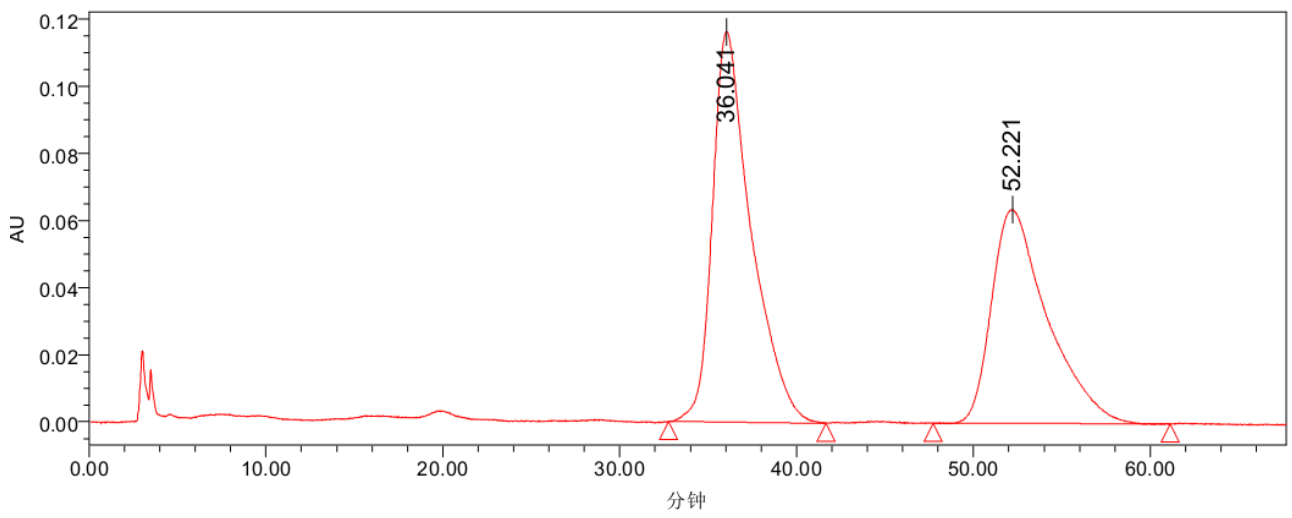

### 处理通道: PDA 230.8 纳米

|   | 处理通道         | 保留时间<br>(分钟) | 面积       | % 面积  | 峰高     |
|---|--------------|--------------|----------|-------|--------|
| 1 | PDA 230.8 纳米 | 36.041       | 17736728 | 55.91 | 116381 |
| 2 | PDA 230.8 纳米 | 52.221       | 13987835 | 44.09 | 63774  |

#### Processing channel: PDA 230.8nm

|   | Processing channel | Retention time<br>(minute) | Area     | Area % | Peak height |
|---|--------------------|----------------------------|----------|--------|-------------|
| 1 | PDA 230.8 nm       | 36.041                     | 17736728 | 55.91  | 116381      |
| 2 | PDA 230.8 nm       | 52.221                     | 13987835 | 44.09  | 63774       |

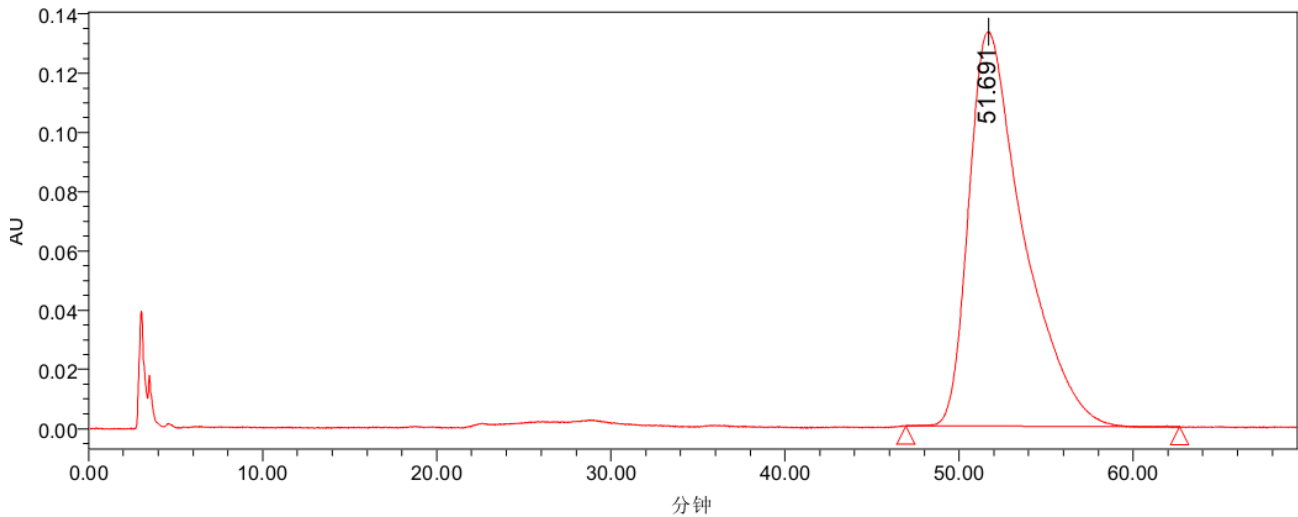

### 处理通道: PDA 230.8 纳米

|   | 处理通道         | 保留时间<br>(分钟) | 面积       | % 面积   | 峰高     |
|---|--------------|--------------|----------|--------|--------|
| 1 | PDA 230.8 纳米 | 51.691       | 28979760 | 100.00 | 133151 |

#### Processing channel: PDA 230.8nm

|   | Processing channel | Retention time<br>(minute) | Area     | Area % | Peak height |
|---|--------------------|----------------------------|----------|--------|-------------|
| 1 | PDA 230.8nm        | 51.691                     | 28979760 | 100.00 | 133151      |



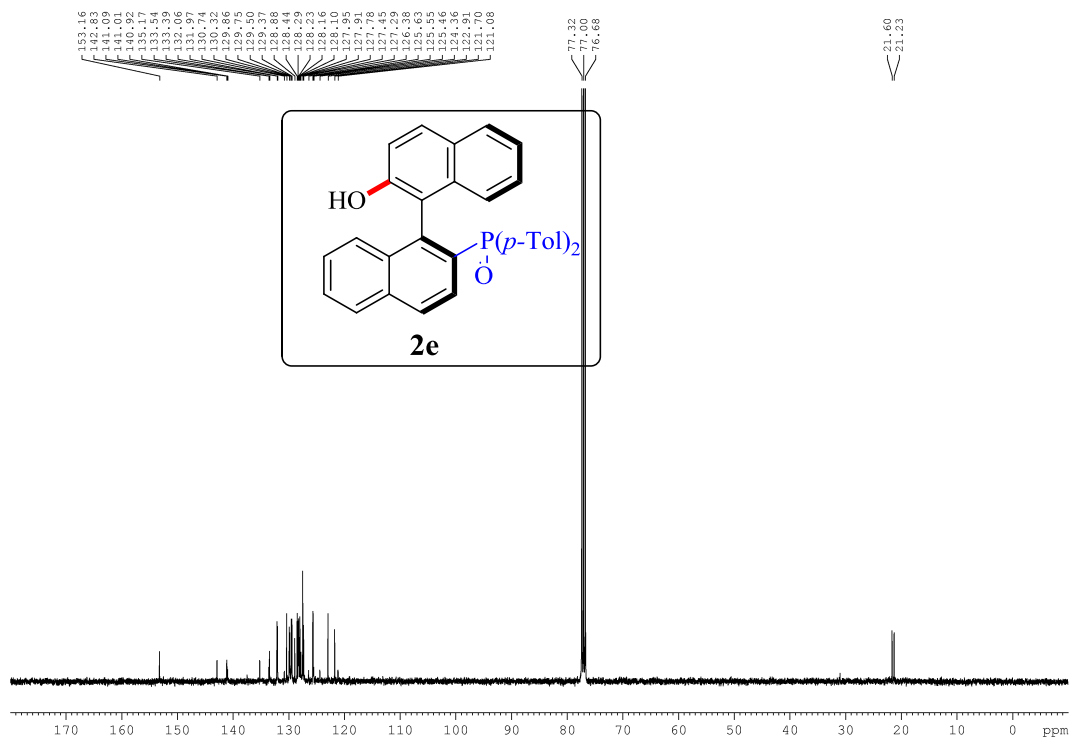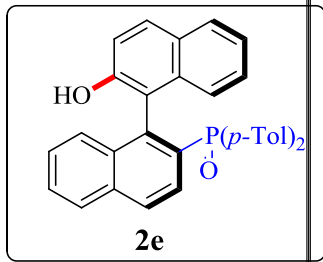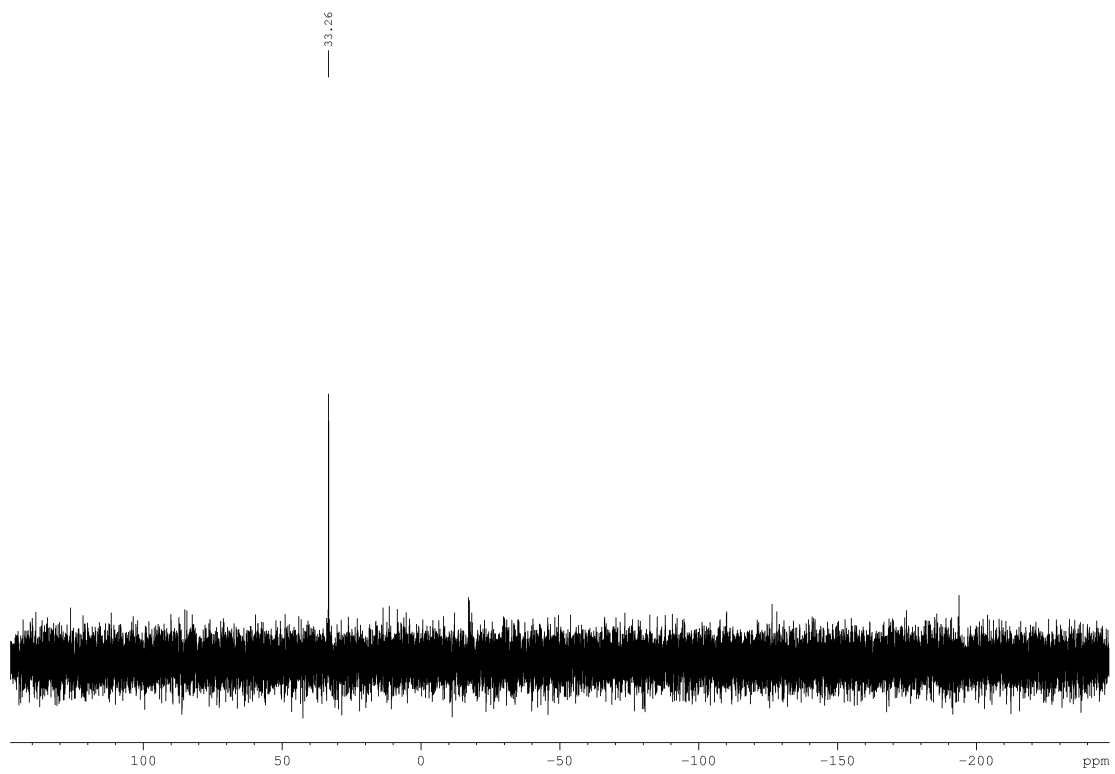

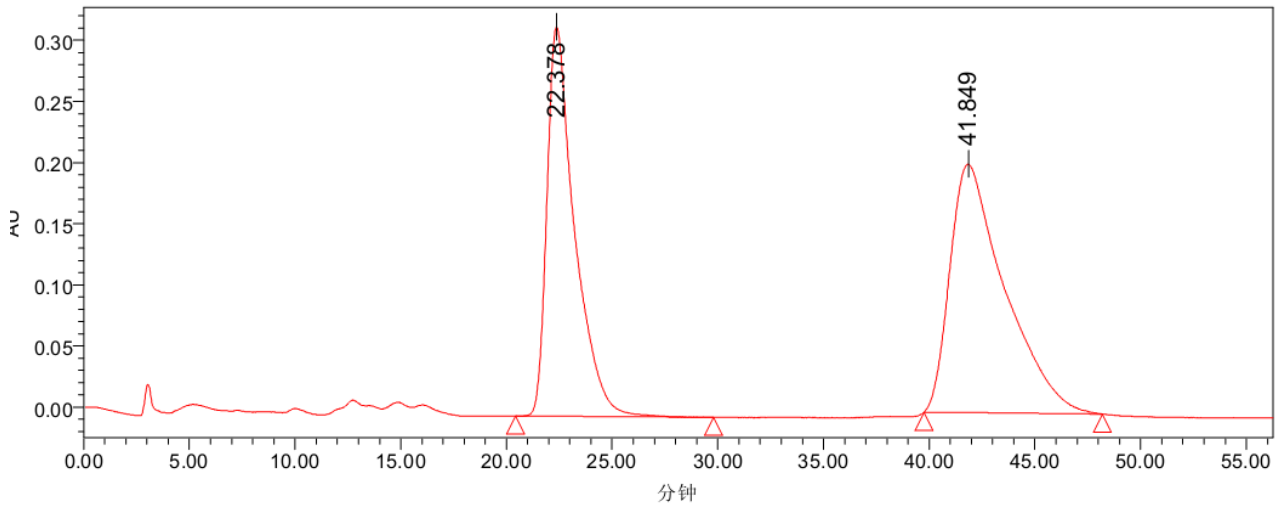

处理通道: PDA 236.7 纳米

|   | 处理通道         | 保留时间 (分钟) | 面积       | % 面积  | 峰高     |
|---|--------------|-----------|----------|-------|--------|
| 1 | PDA 236.7 纳米 | 22.378    | 29034173 | 44.20 | 318496 |
| 2 | PDA 236.7 纳米 | 41.849    | 36661096 | 55.80 | 203379 |

Processing channel: PDA 236.7nm

|   | Processing channel | Retention time (minute) | Area     | Area % | Peak height |
|---|--------------------|-------------------------|----------|--------|-------------|
| 1 | PDA 236.7nm        | 22.378                  | 29034173 | 44.20  | 318496      |
| 2 | PDA 236.7 nm       | 41.849                  | 36661096 | 55.80  | 203379      |

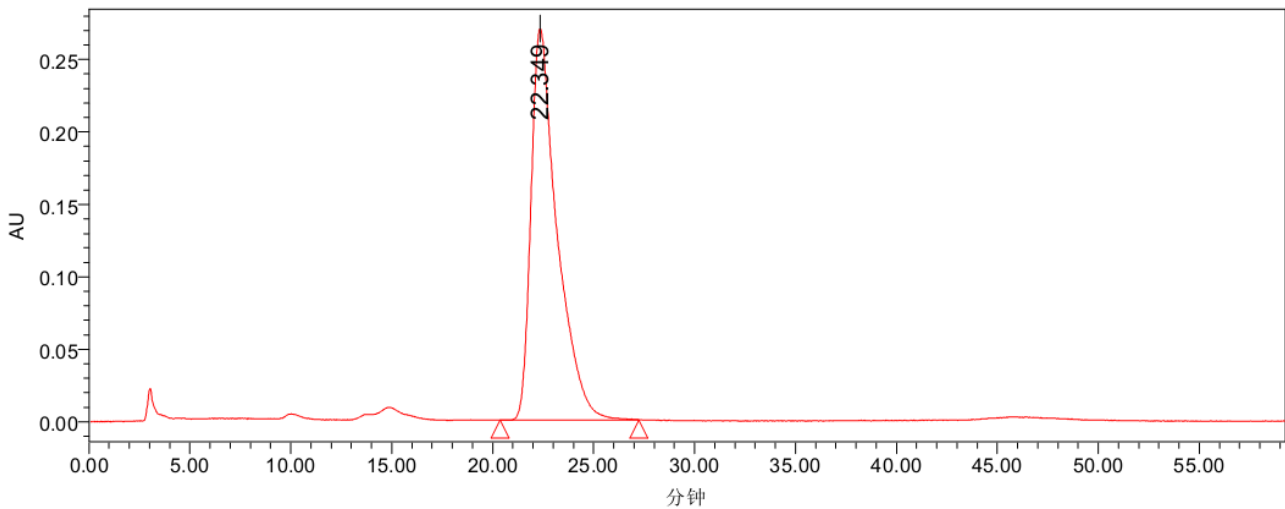

### 处理通道: PDA 236.7 纳米

|   | 处理通道         | 保留时间<br>(分钟) | 面积       | % 面积   | 峰高     |
|---|--------------|--------------|----------|--------|--------|
| 1 | PDA 236.7 纳米 | 22.349       | 24311437 | 100.00 | 270218 |

### Processing channel: PDA 236.7nm

|   | Processing channel | Retention time<br>(minute) | Area     | Area % | Peak height |
|---|--------------------|----------------------------|----------|--------|-------------|
| 1 | PDA 236.7nm        | 22.349                     | 24311437 | 100.00 | 270218      |

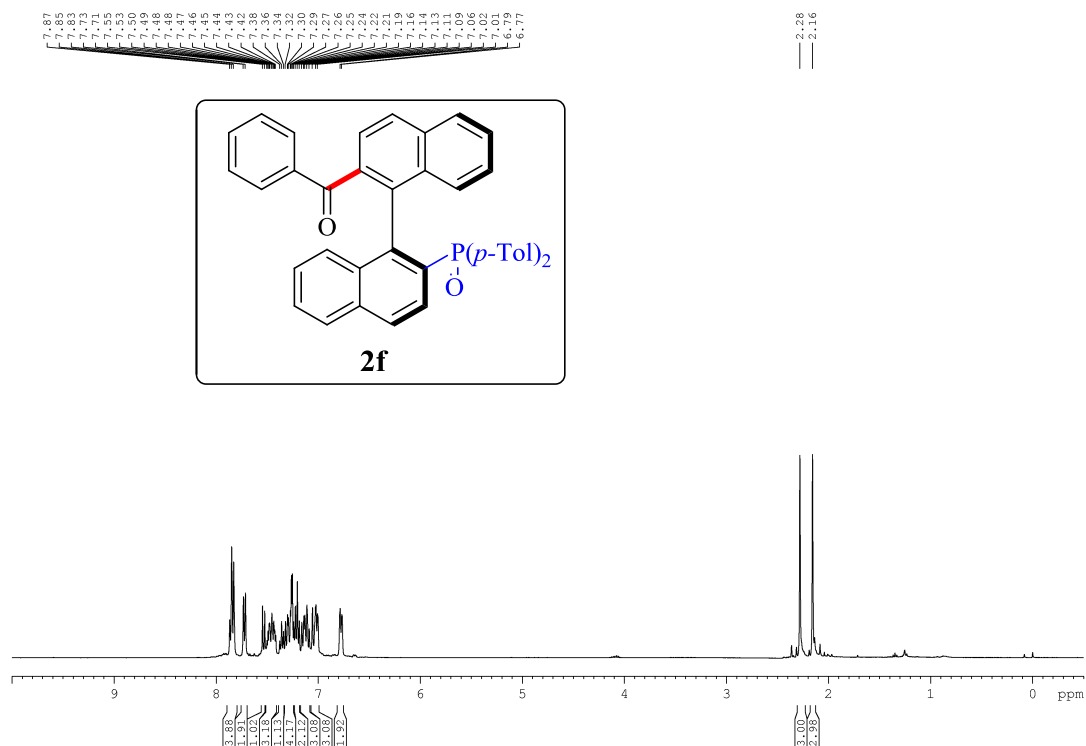

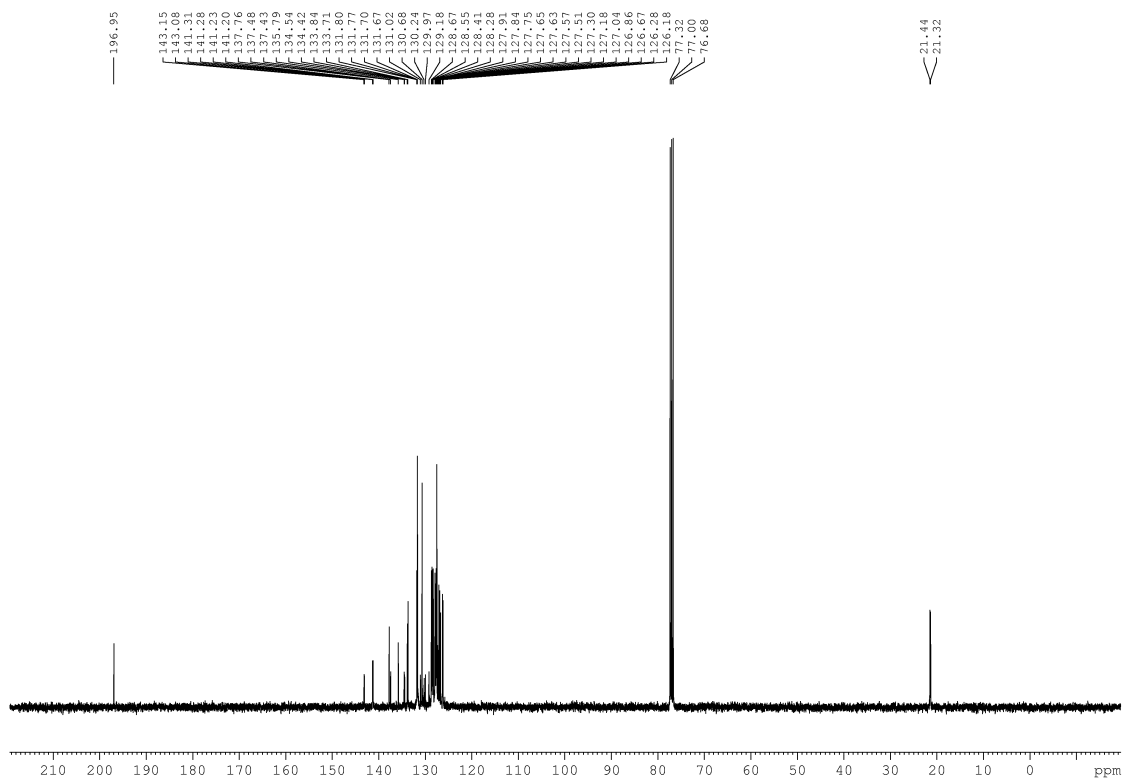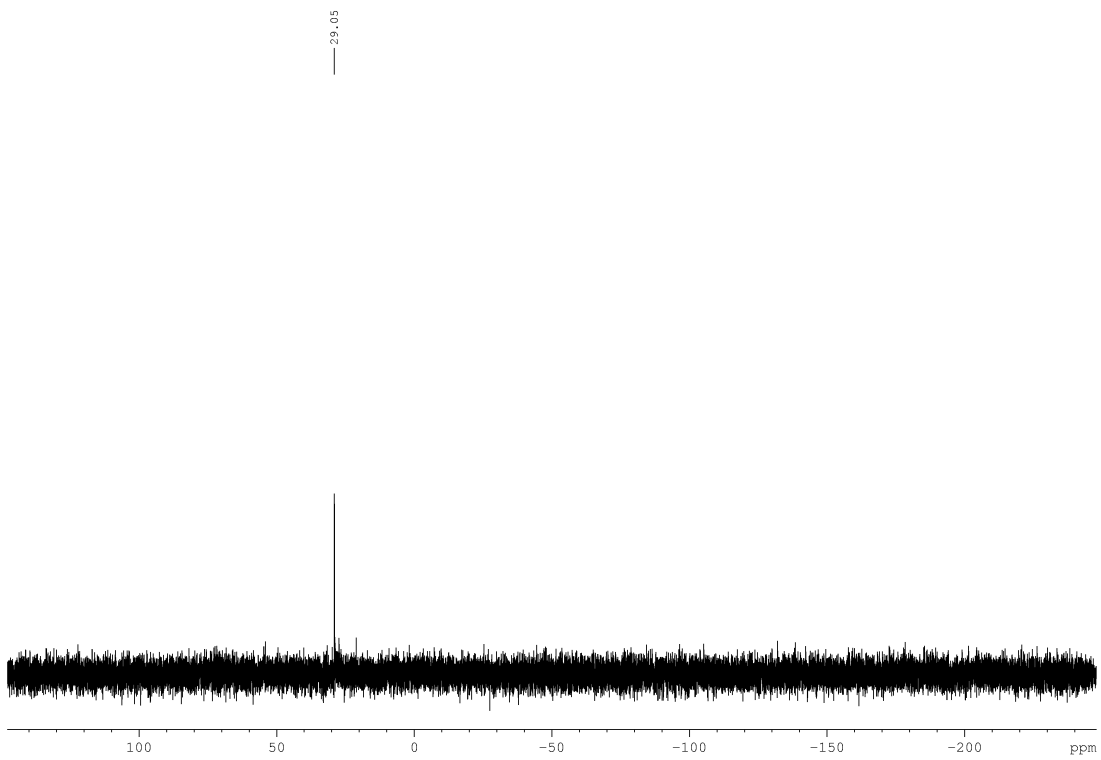

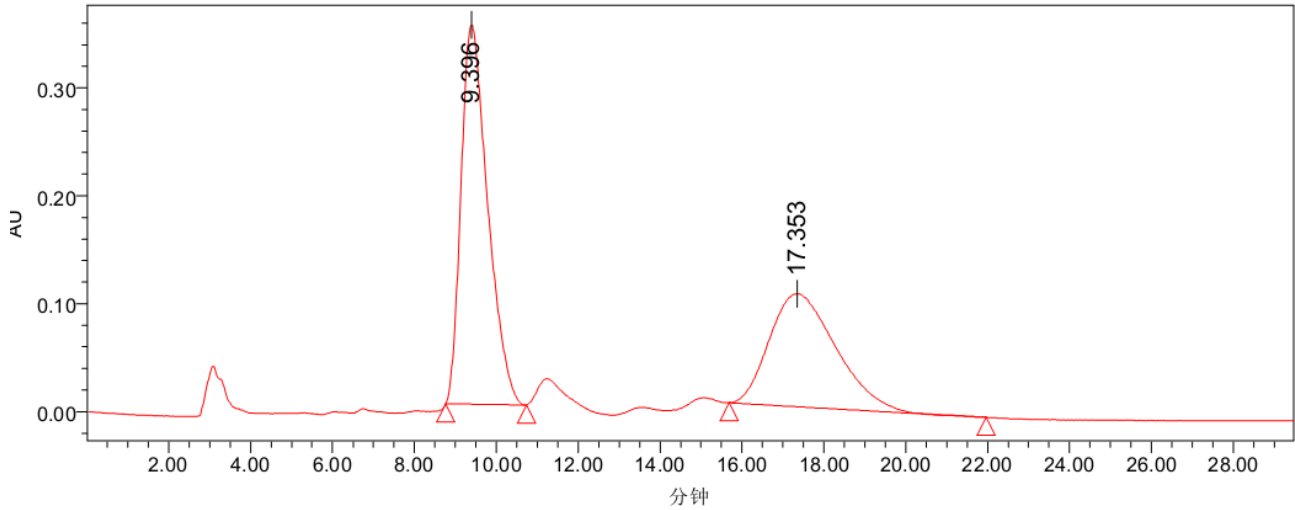

处理通道: PDA 233.2 纳米

|   | 处理通道         | 保留时间 (分钟) | 面积       | % 面积  | 峰高     |
|---|--------------|-----------|----------|-------|--------|
| 1 | PDA 233.2 纳米 | 9.396     | 15900546 | 57.35 | 351301 |
| 2 | PDA 233.2 纳米 | 17.353    | 11822919 | 42.65 | 104642 |

Processing channel: PDA 233.2nm

|   | Processing channel | Retention time (minute) | Area     | Area % | Peak height |
|---|--------------------|-------------------------|----------|--------|-------------|
| 1 | PDA 233.2nm        | 9.396                   | 29034173 | 57.35  | 351301      |
| 2 | PDA 233.2nm        | 17.353                  | 11822919 | 42.65  | 104642      |

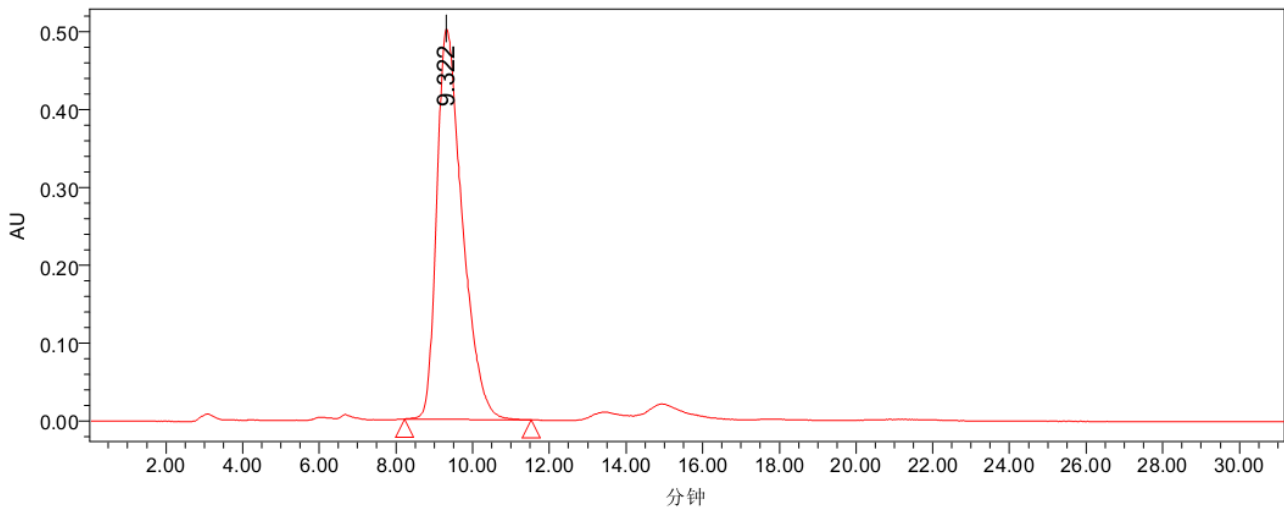

### 处理通道: PDA 233.2 纳米

|   | 处理通道         | 保留时间<br>(分钟) | 面积       | % 面积   | 峰高     |
|---|--------------|--------------|----------|--------|--------|
| 1 | PDA 233.2 纳米 | 9.322        | 23204244 | 100.00 | 502337 |

### Processing channel: PDA 233.2nm

|   | Processing channel | Retention time<br>(minute) | Area     | Area % | Peak height |
|---|--------------------|----------------------------|----------|--------|-------------|
| 1 | PDA 233.2nm        | 9.322                      | 23204244 | 100.00 | 502337      |

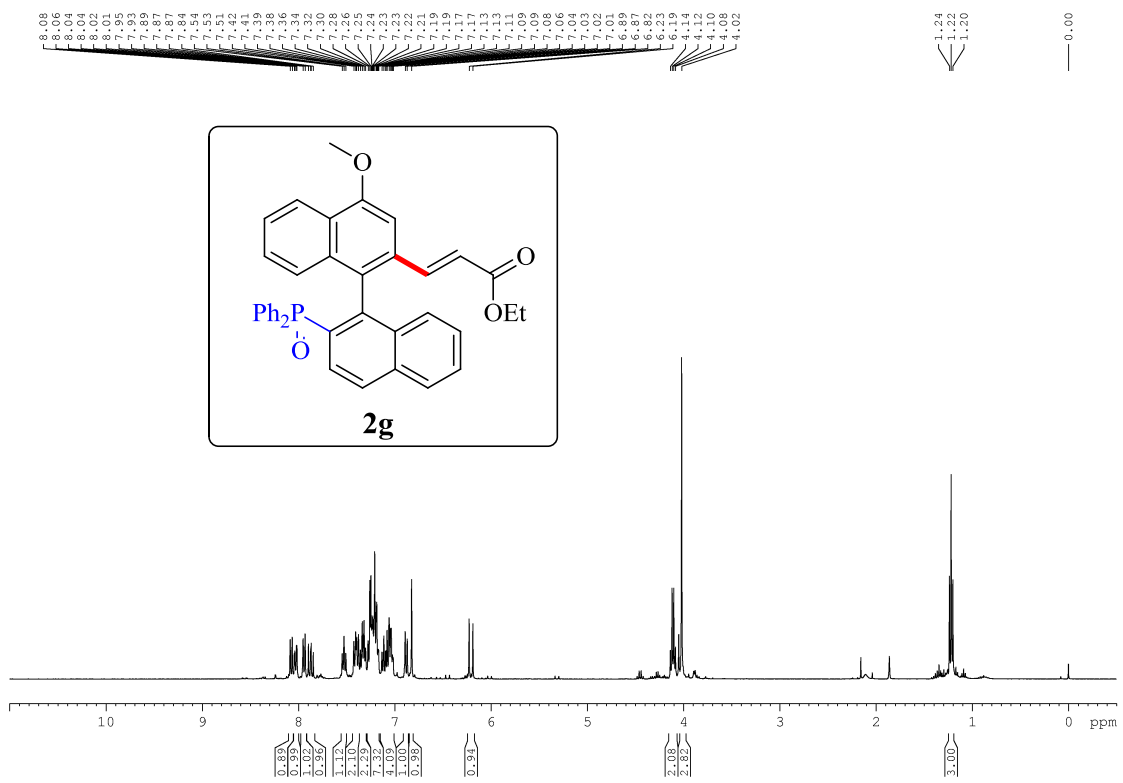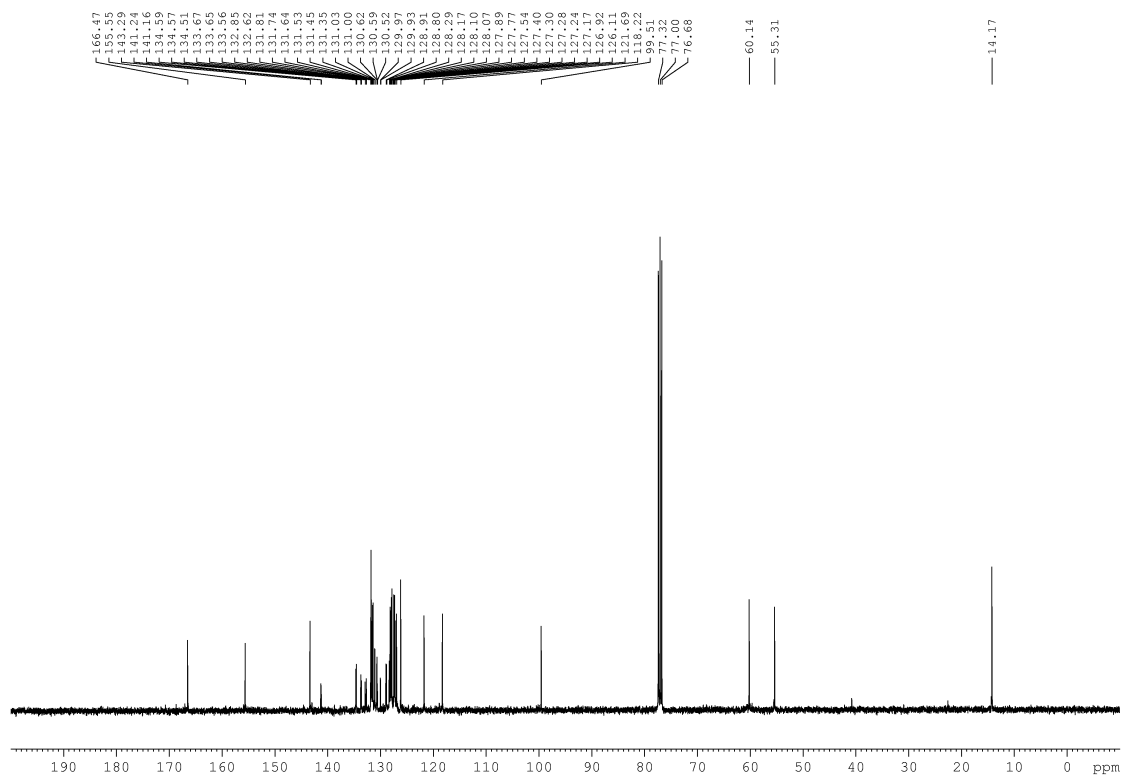

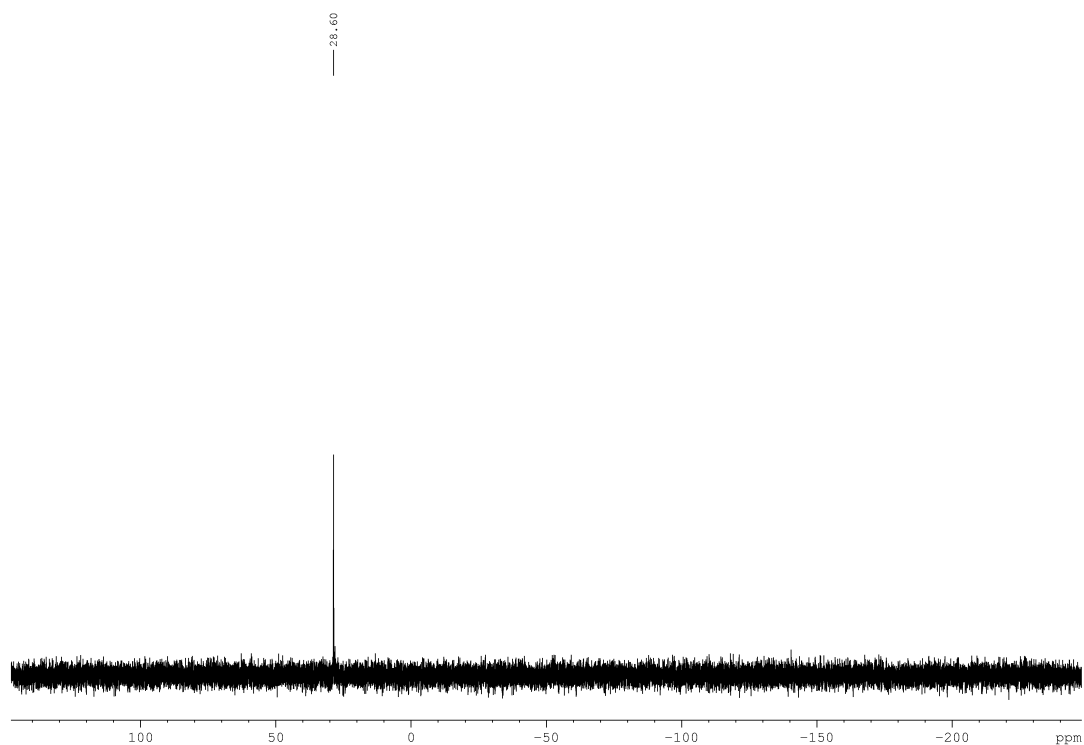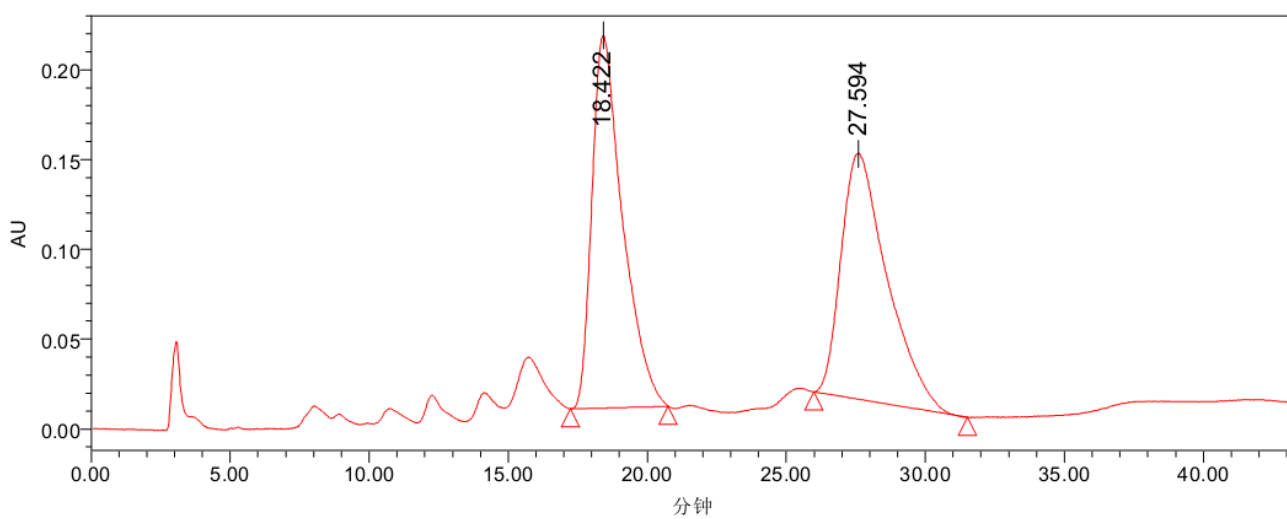

### 处理通道: PDA 237.9 纳米

|   | 处理通道         | 保留时间<br>(分钟) | 面积       | % 面积  | 峰高     |
|---|--------------|--------------|----------|-------|--------|
| 1 | PDA 237.9 纳米 | 18.422       | 15886727 | 50.18 | 207417 |
| 2 | PDA 237.9 纳米 | 27.594       | 15774759 | 49.82 | 136827 |



Processing channel: PDA 237.9nm

|   | Processing channel | Retention time (minute) | Area     | Area % | Peak height |
|---|--------------------|-------------------------|----------|--------|-------------|
| 1 | PDA 237.9nm        | 18.422                  | 15886727 | 50.18  | 207417      |
| 2 | PDA 237.9nm        | 27.594                  | 15774759 | 49.82  | 136827      |

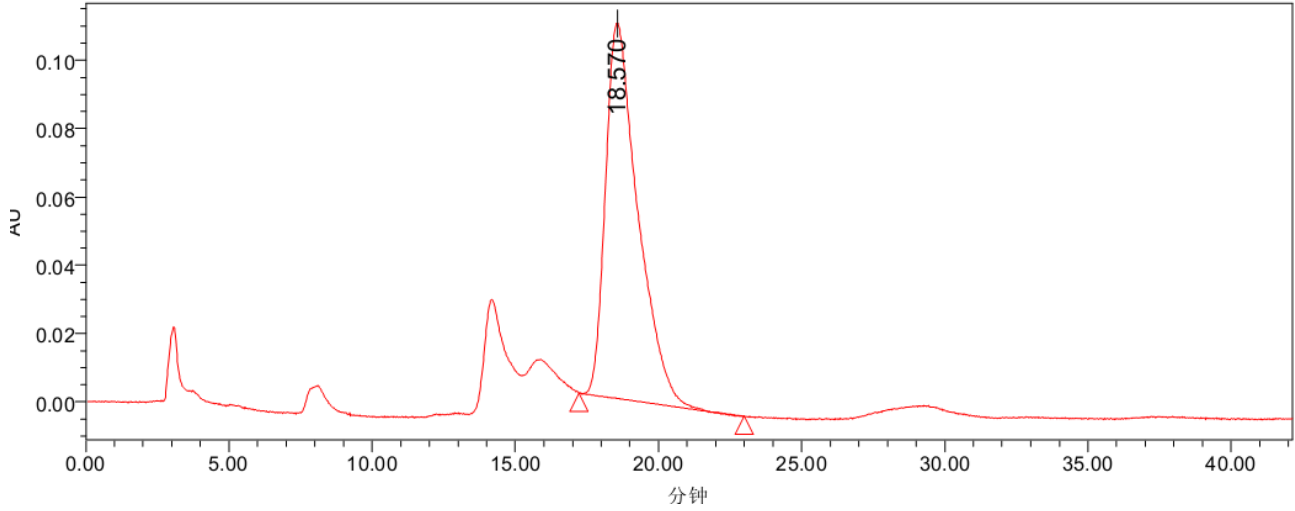

处理通道: PDA 237.9 纳米

|   | 处理通道         | 保留时间 (分钟) | 面积      | % 面积   | 峰高     |
|---|--------------|-----------|---------|--------|--------|
| 1 | PDA 237.9 纳米 | 18.570    | 8670714 | 100.00 | 109947 |

Processing channel: PDA 237.9nm

|   | Processing channel | Retention time (minute) | Area    | Area % | Peak height |
|---|--------------------|-------------------------|---------|--------|-------------|
| 1 | PDA 237.9nm        | 18.570                  | 8670714 | 100.00 | 109947      |

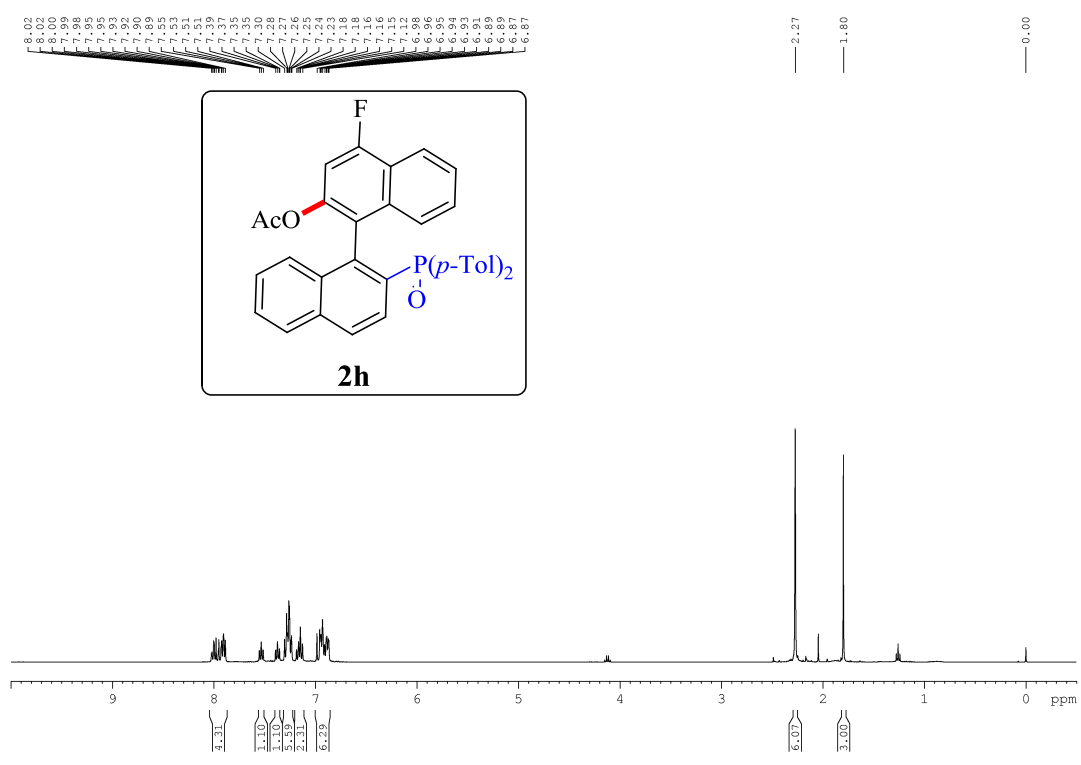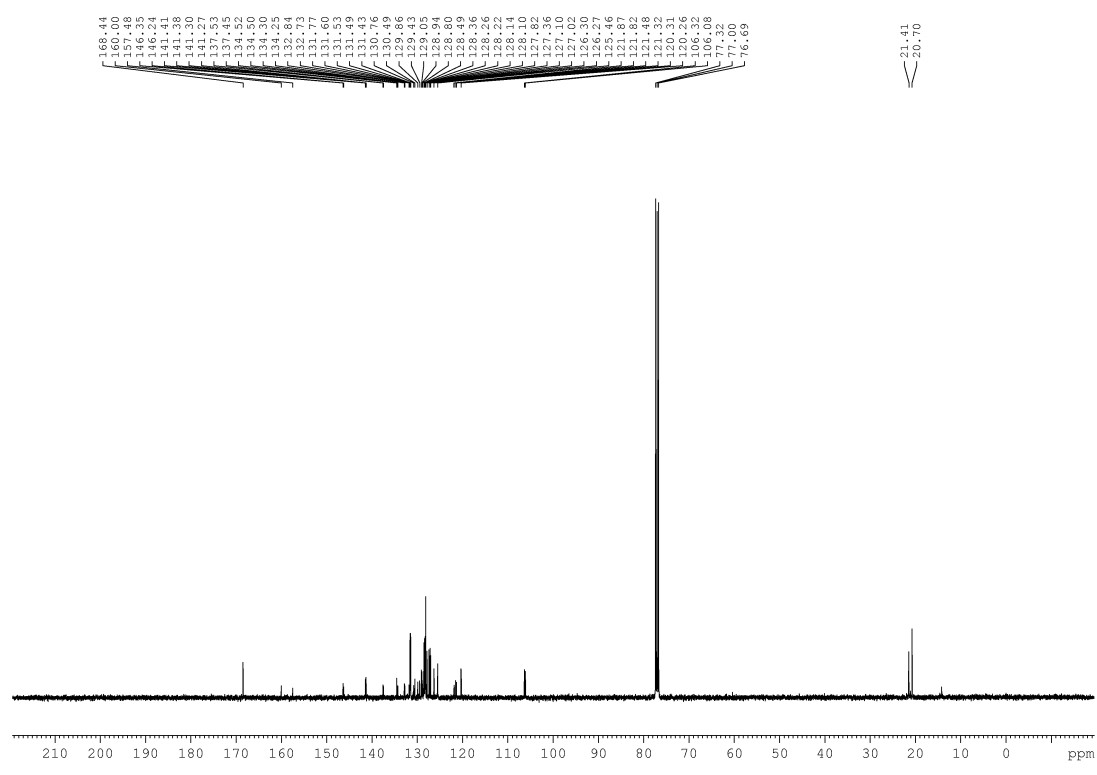

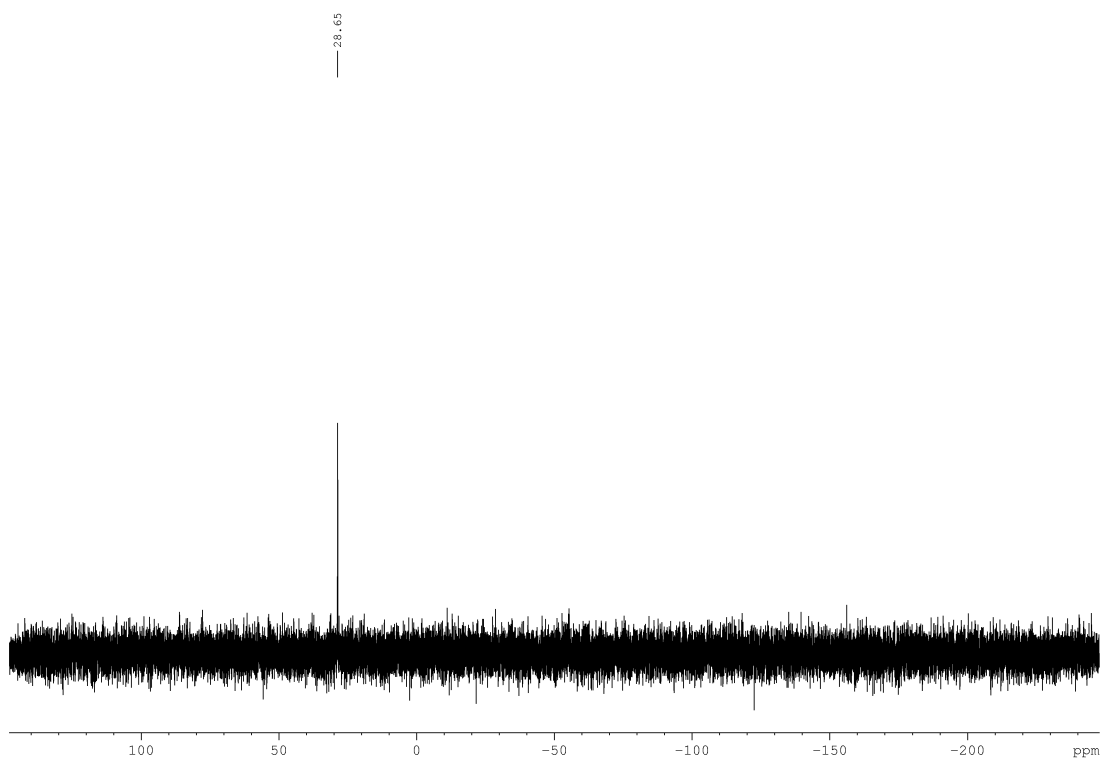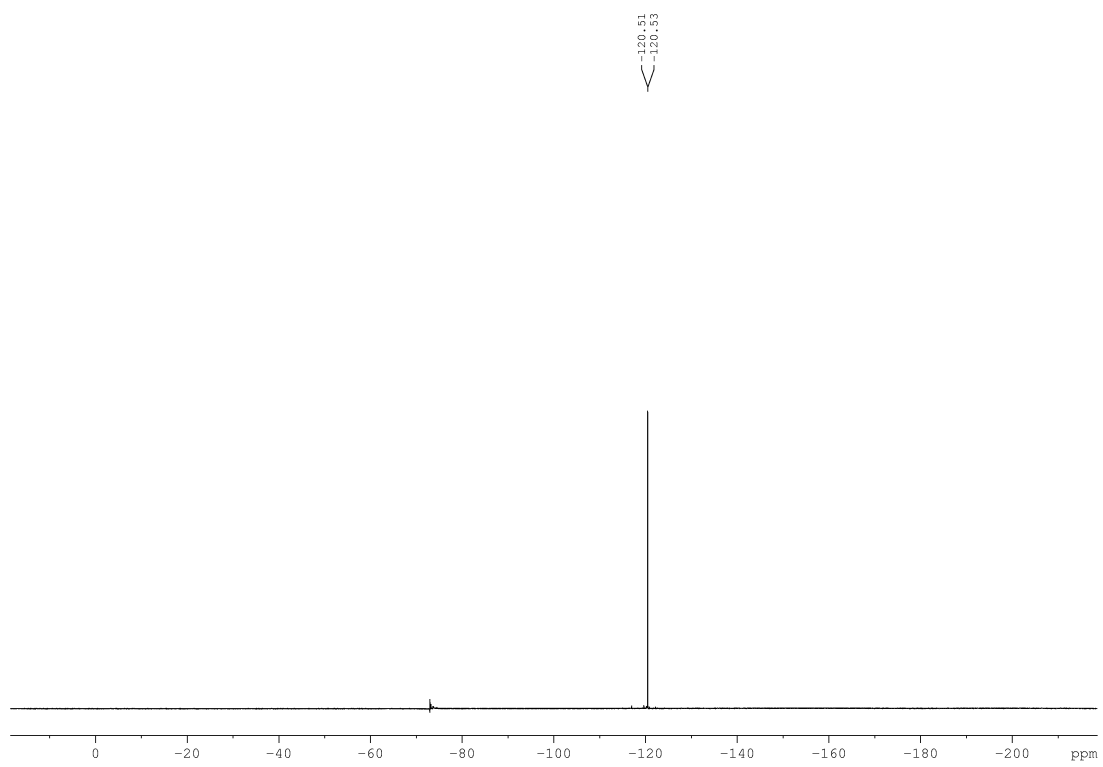

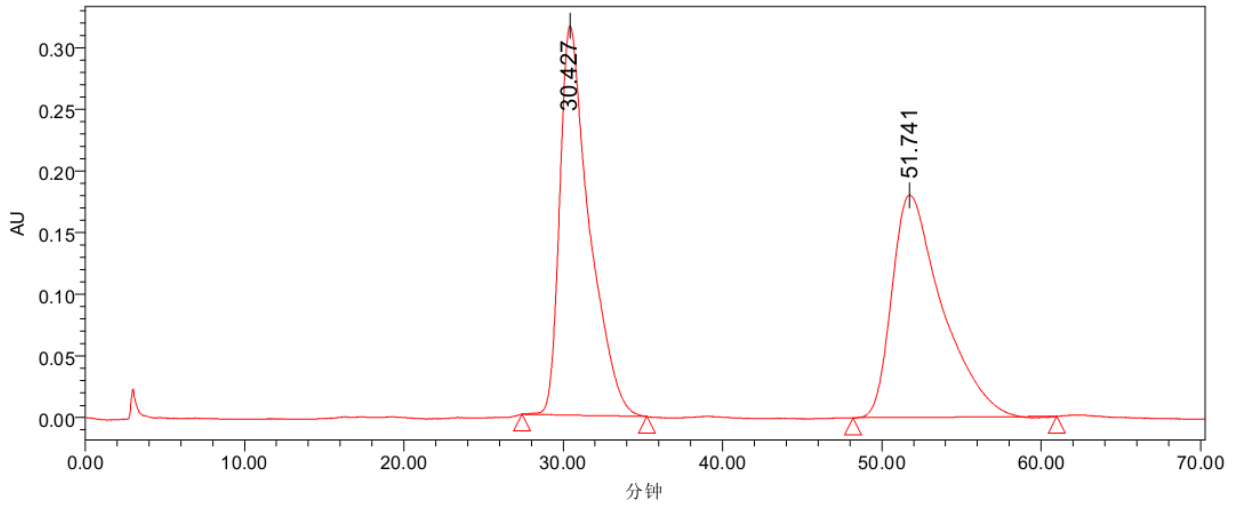

处理通道: PDA 233.2 纳米

|   | 处理通道         | 保留时间<br>(分钟) | 面积       | % 面积  | 峰高     |
|---|--------------|--------------|----------|-------|--------|
| 1 | PDA 233.2 纳米 | 30.427       | 40709312 | 50.72 | 315869 |
| 2 | PDA 233.2 纳米 | 51.741       | 39558129 | 49.28 | 180431 |

Processing channel: PDA 233.2nm

|   | Processing channel | Retention time<br>(minute) | Area     | Area % | Peak height |
|---|--------------------|----------------------------|----------|--------|-------------|
| 1 | PDA 233.2nm        | 30.427                     | 40709312 | 50.72  | 315869      |
| 2 | PDA 233.2nm        | 51.741                     | 39558129 | 48.28  | 180431      |

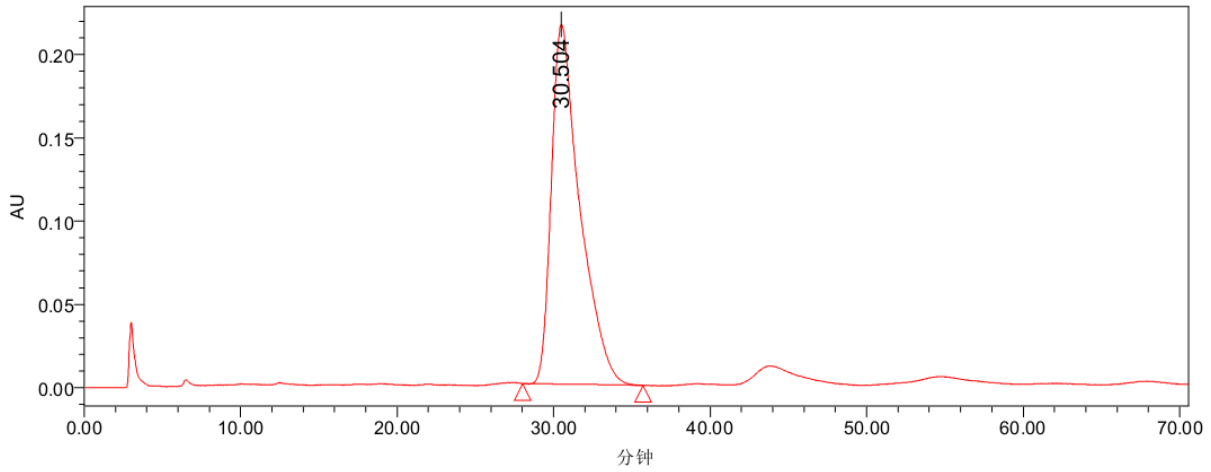

**处理通道: PDA 233.2 纳米**

|   | 处理通道         | 保留时间<br>(分钟) | 面积       | % 面积   | 峰高     |
|---|--------------|--------------|----------|--------|--------|
| 1 | PDA 233.2 纳米 | 30.504       | 27347121 | 100.00 | 216054 |

**Processing channel: PDA 233.2nm**

|   | Processing channel | Retention time<br>(minute) | Area     | Area % | Peak height |
|---|--------------------|----------------------------|----------|--------|-------------|
| 1 | PDA 233.2nm        | 30.504                     | 27347121 | 100.00 | 216054      |

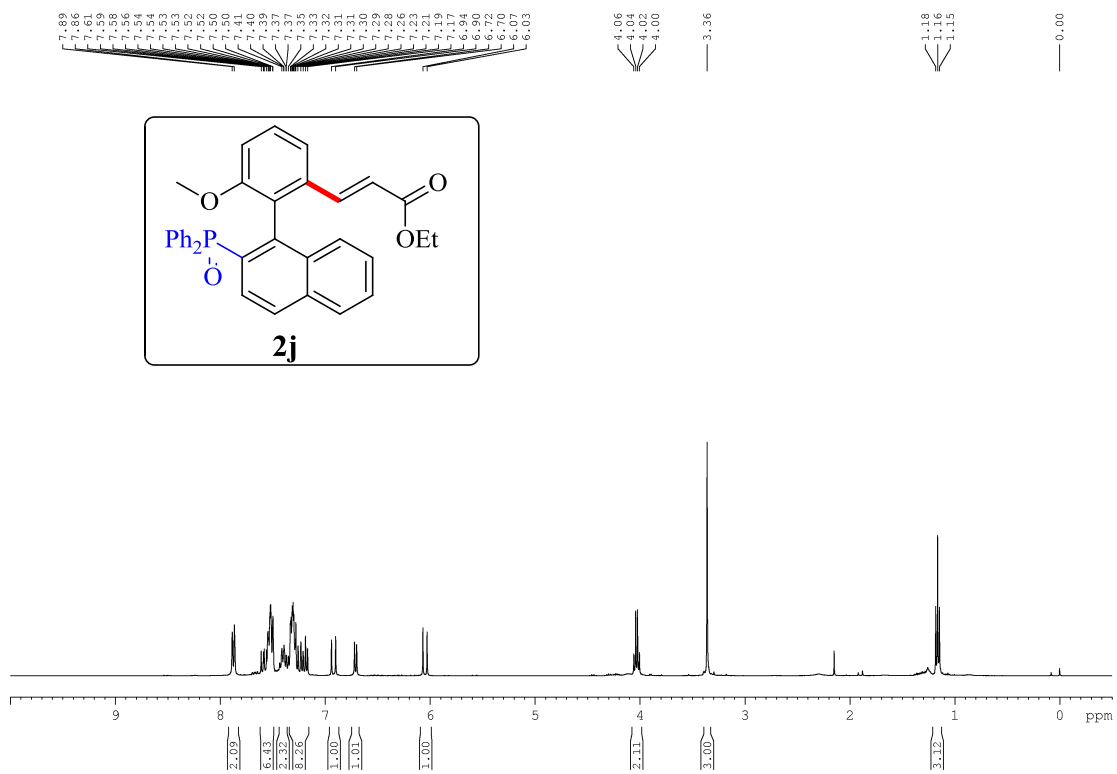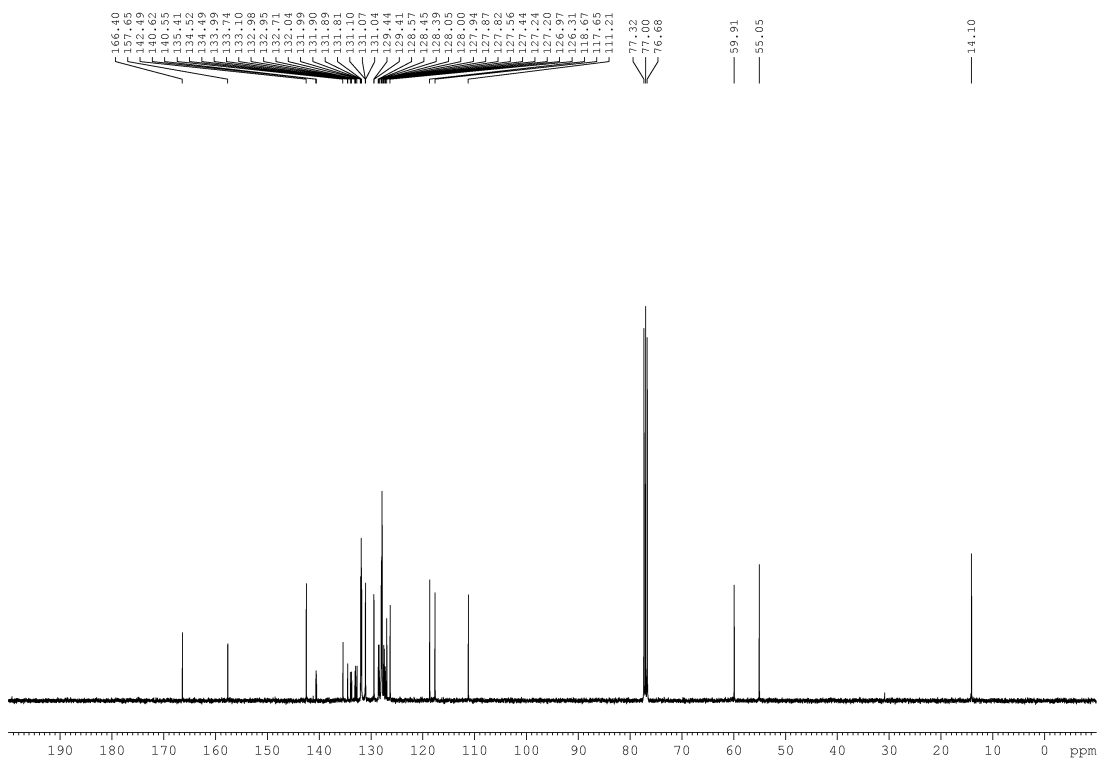

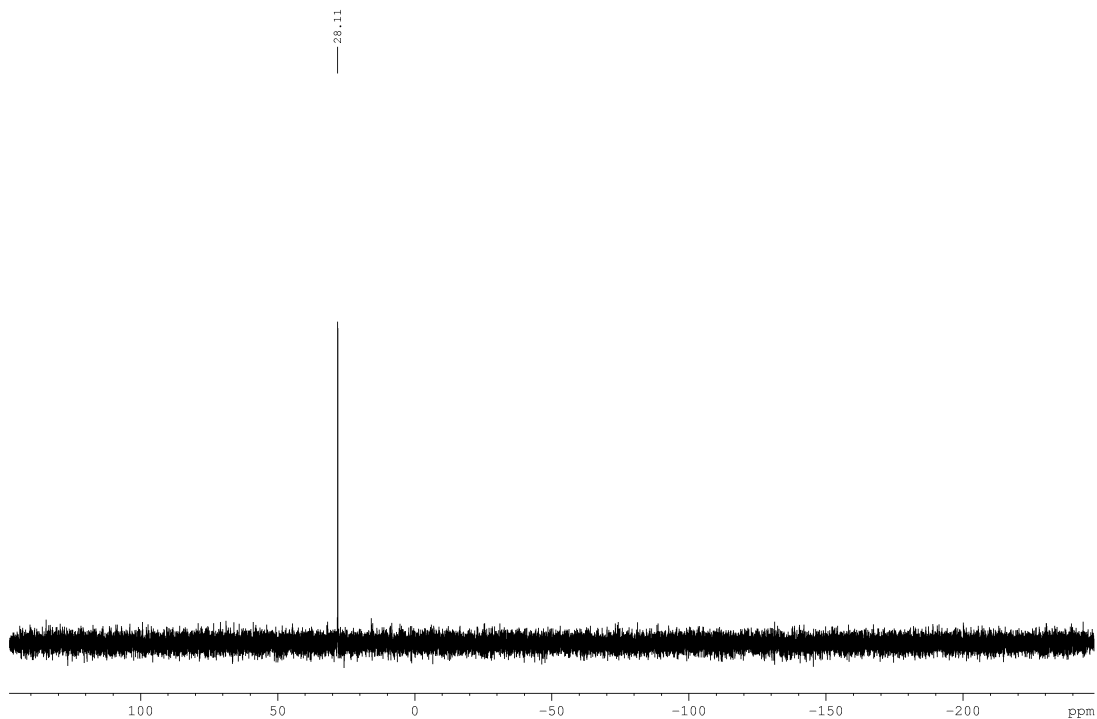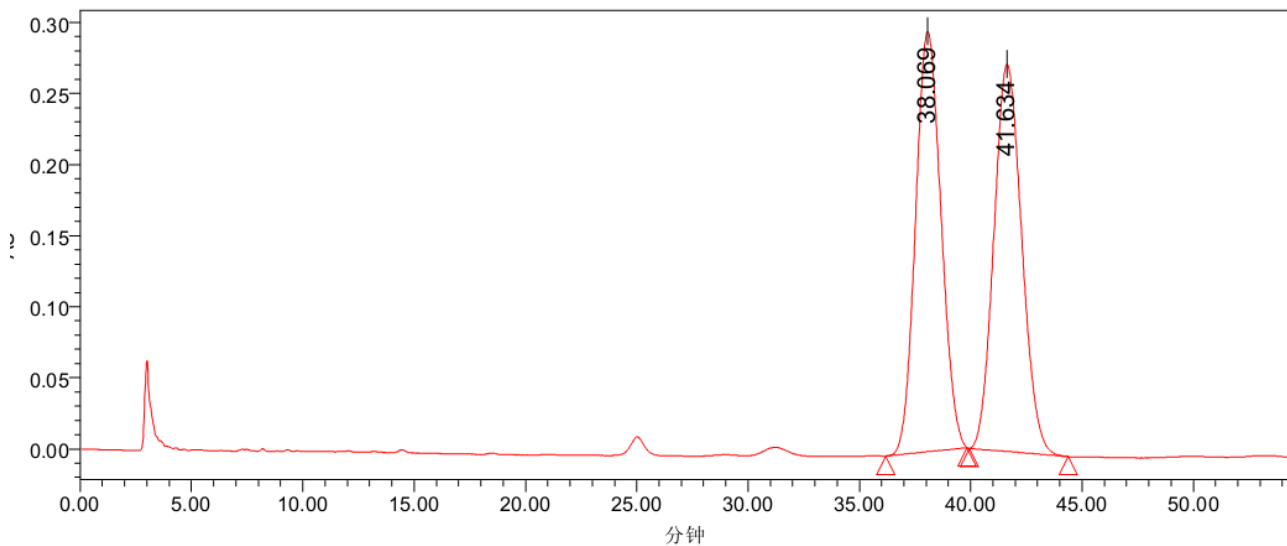

处理通道: **PDA 229.7 纳米**

|   | 处理通道         | 保留时间<br>(分钟) | 面积       | % 面积  | 峰高     |
|---|--------------|--------------|----------|-------|--------|
| 1 | PDA 229.7 纳米 | 38.069       | 23460782 | 49.75 | 295552 |
| 2 | PDA 229.7 纳米 | 41.634       | 23695855 | 50.25 | 272443 |

**Processing channel: PDA 229.7nm**

|   | Processing channel | Retention time (minute) | Area     | Area % | Peak height |
|---|--------------------|-------------------------|----------|--------|-------------|
| 1 | PDA 229.7nm        | 38.069                  | 23460782 | 49.75  | 295552      |
| 2 | PDA 229.7nm        | 41.634                  | 23695855 | 50.25  | 272443      |

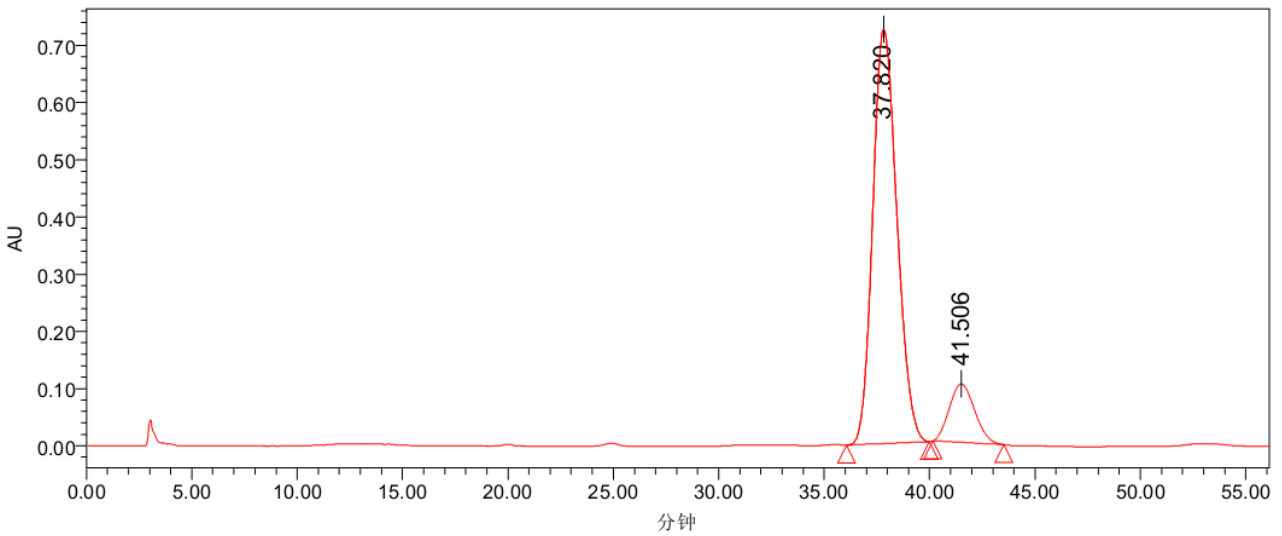

**处理通道: PDA 235.1 纳米**

|   | 处理通道         | 保留时间 (分钟) | 面积       | % 面积  | 峰高     |
|---|--------------|-----------|----------|-------|--------|
| 1 | PDA 235.1 纳米 | 37.820    | 57678578 | 87.07 | 724170 |
| 2 | PDA 235.1 纳米 | 41.506    | 8564760  | 12.93 | 102220 |

**Processing channel: PDA 235.1nm**

|   | Processing channel | Retention time (minute) | Area     | Area % | Peak height |
|---|--------------------|-------------------------|----------|--------|-------------|
| 1 | PDA 235.1nm        | 37.820                  | 57678578 | 87.07  | 724170      |
| 2 | PDA 235.1nm        | 41.506                  | 8560760  | 12.93  | 102220      |



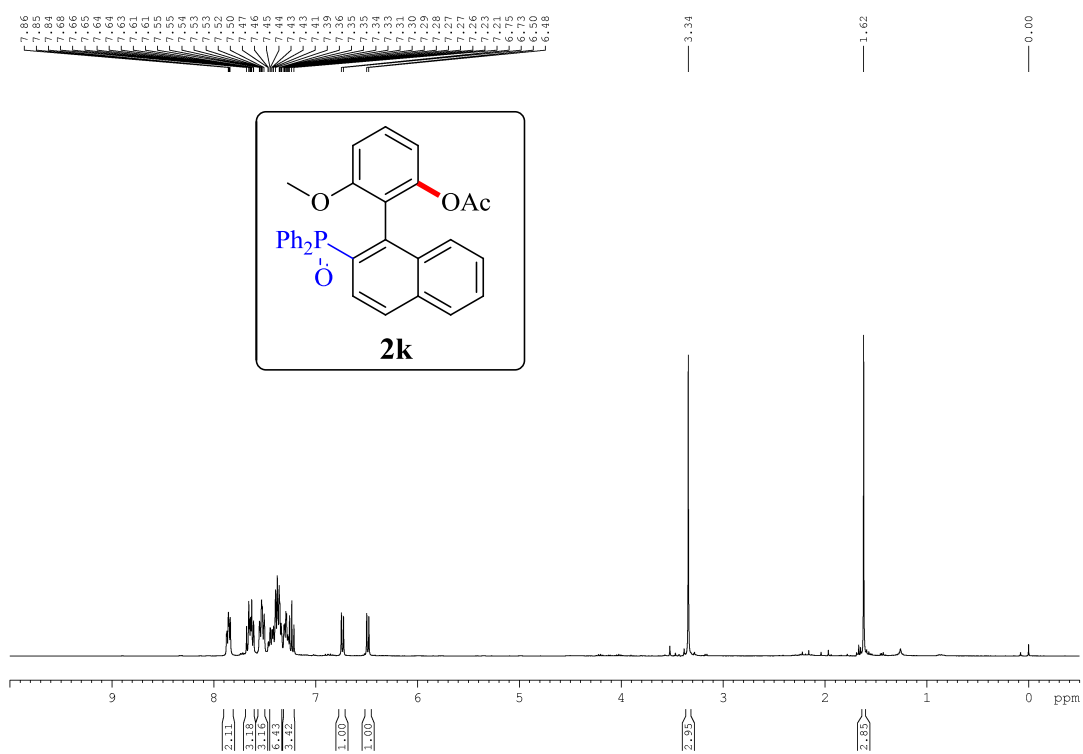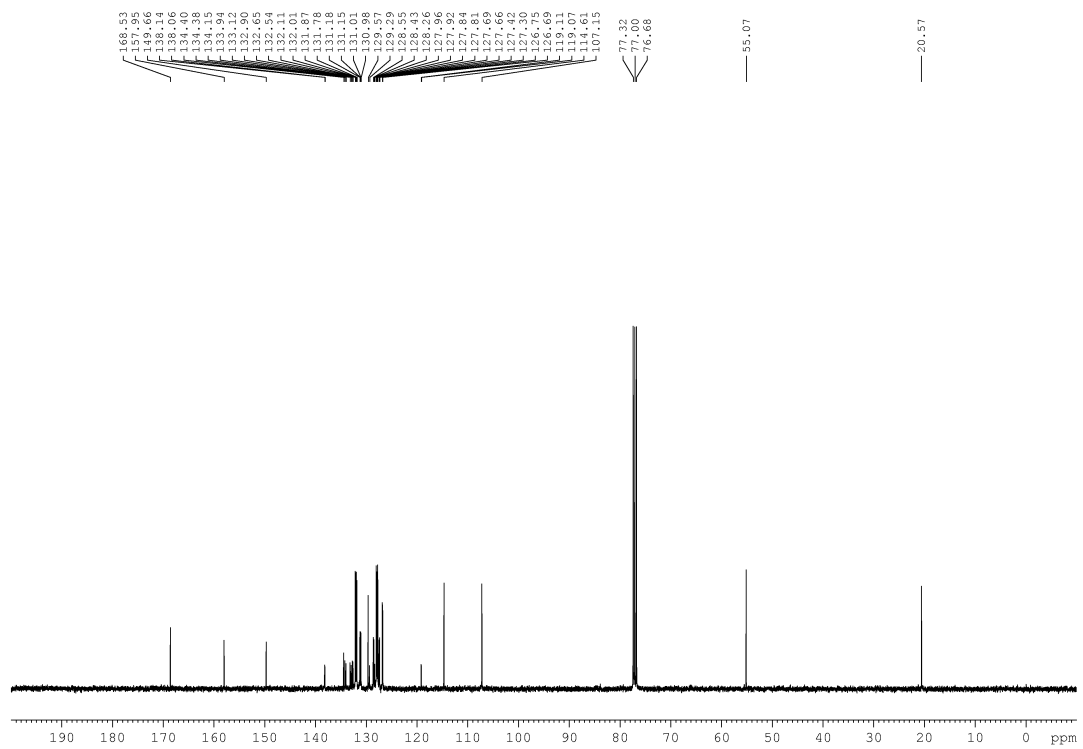

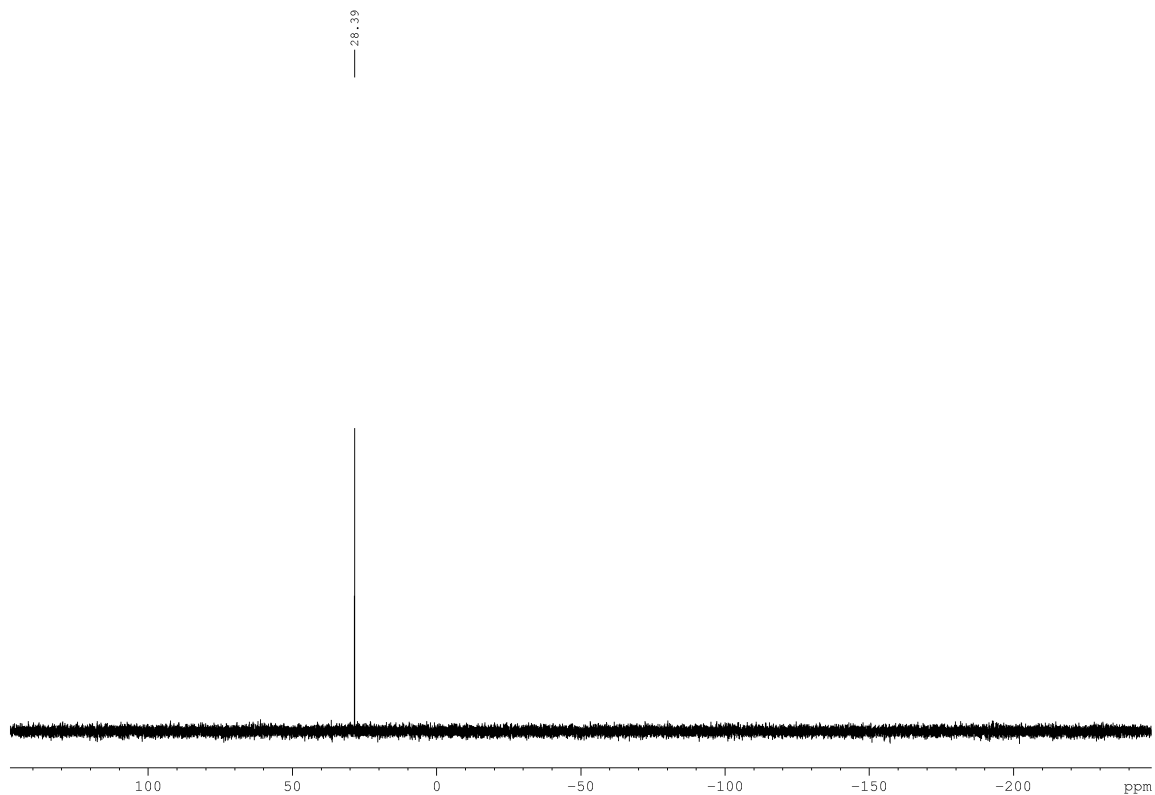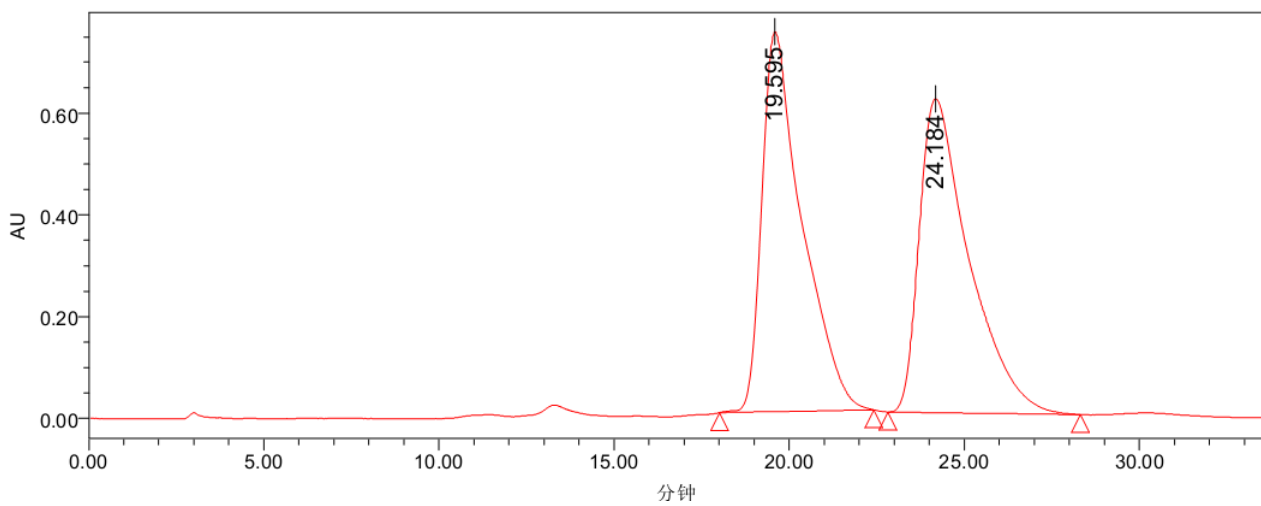

处理通道: **PDA 236.7 纳米**

|   | 处理通道         | 保留时间<br>(分钟) | 面积       | % 面积  | 峰高     |
|---|--------------|--------------|----------|-------|--------|
| 1 | PDA 236.7 纳米 | 19.595       | 59648584 | 49.45 | 747000 |
| 2 | PDA 236.7 纳米 | 24.184       | 60979640 | 50.55 | 617442 |

Processing channel: PDA 236.7nm

|   | Processing channel | Retention time (minute) | Area     | Area % | Peak height |
|---|--------------------|-------------------------|----------|--------|-------------|
| 1 | PDA 236.7nm        | 19.595                  | 59648584 | 49.45  | 747000      |
| 2 | PDA 236.7nm        | 24.184                  | 60979640 | 50.55  | 617442      |

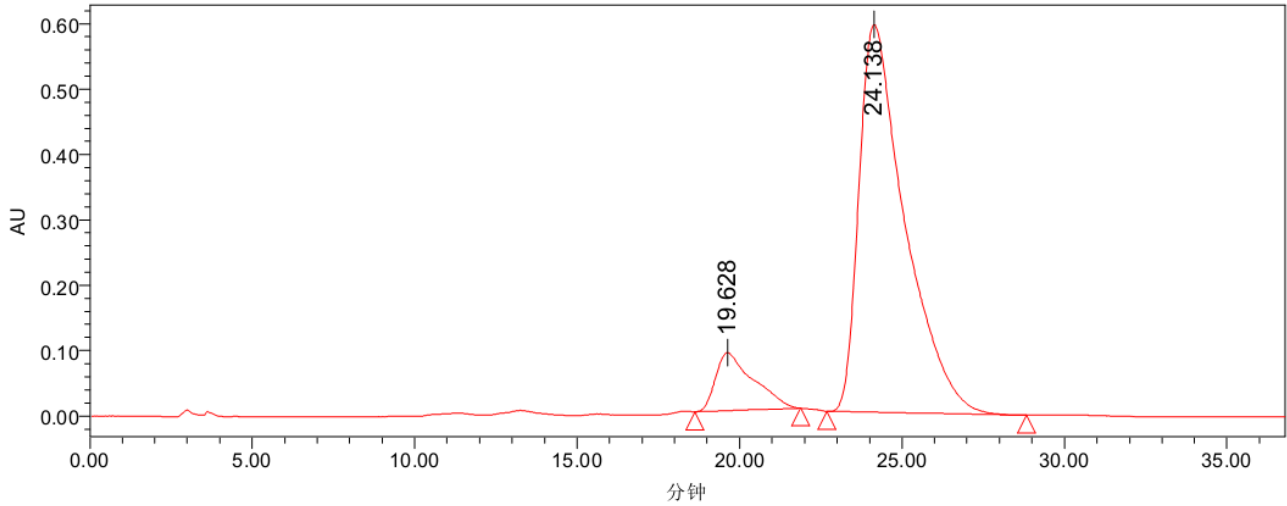

处理通道: PDA 236.7 纳米

|   | 处理通道         | 保留时间 (分钟) | 面积       | % 面积  | 峰高     |
|---|--------------|-----------|----------|-------|--------|
| 1 | PDA 236.7 纳米 | 19.628    | 7123913  | 10.88 | 88652  |
| 2 | PDA 236.7 纳米 | 24.138    | 58329832 | 89.12 | 593536 |

Processing channel: PDA 236.7nm

|   | Processing channel | Retention time (minute) | Area     | Area % | Peak height |
|---|--------------------|-------------------------|----------|--------|-------------|
| 1 | PDA 236.7nm        | 19.628                  | 7123913  | 10.88  | 88652       |
| 2 | PDA 236.7nm        | 24.138                  | 58329832 | 89.12  | 593536      |

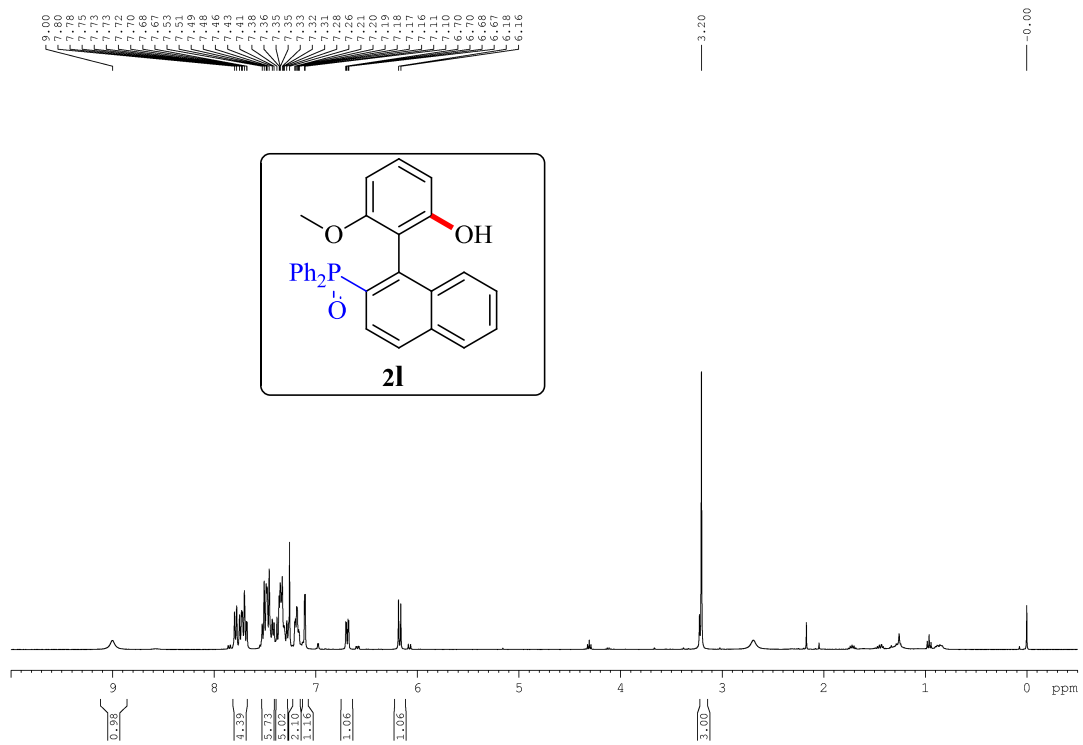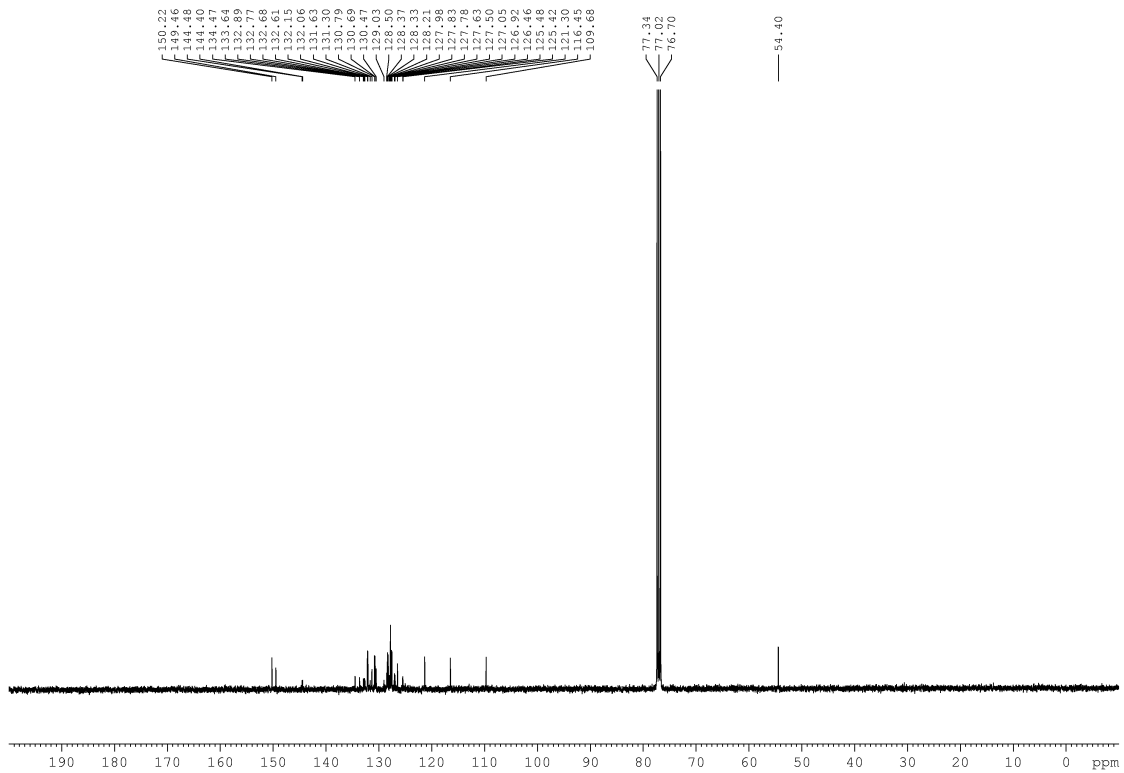

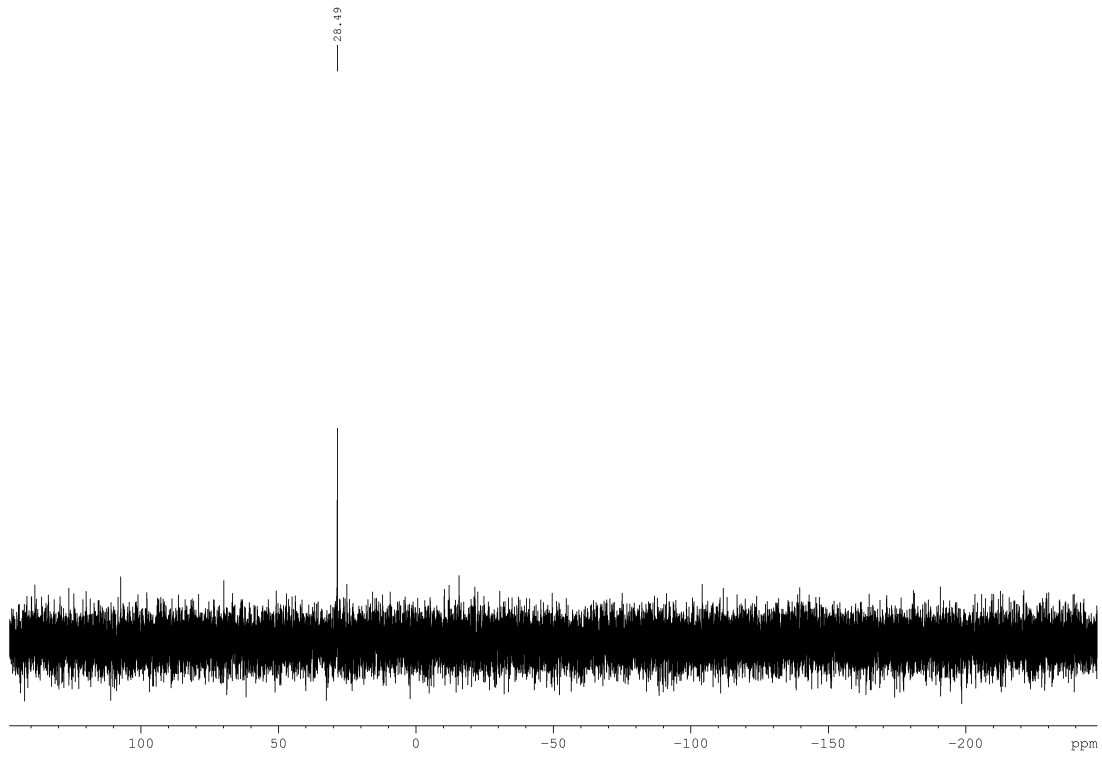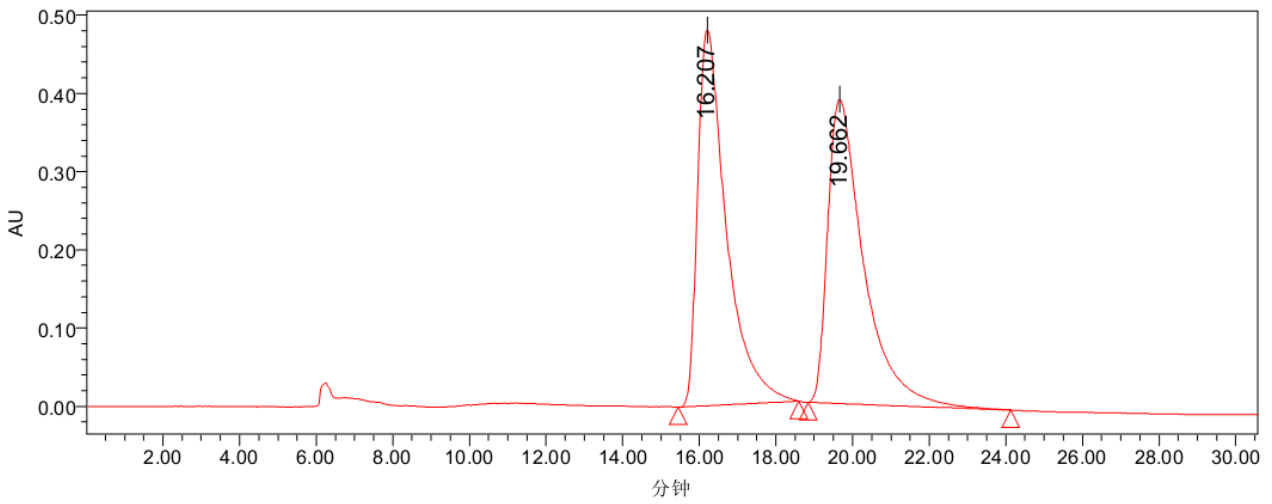

处理通道: PDA 237.9 纳米

|   | 处理通道         | 保留时间<br>(分钟) | 面积       | % 面积  | 峰高     |
|---|--------------|--------------|----------|-------|--------|
| 1 | PDA 237.9 纳米 | 16.207       | 24960109 | 49.63 | 480433 |
| 2 | PDA 237.9 纳米 | 19.662       | 25331296 | 50.37 | 389016 |

Processing channel: PDA 237.9nm

|   | Processing channel | Retention time (minute) | Area     | Area % | Peak height |
|---|--------------------|-------------------------|----------|--------|-------------|
| 1 | PDA 237.9nm        | 16.207                  | 24960109 | 49.63  | 480433      |
| 2 | PDA 237.9nm        | 19.662                  | 25331296 | 50.37  | 389016      |

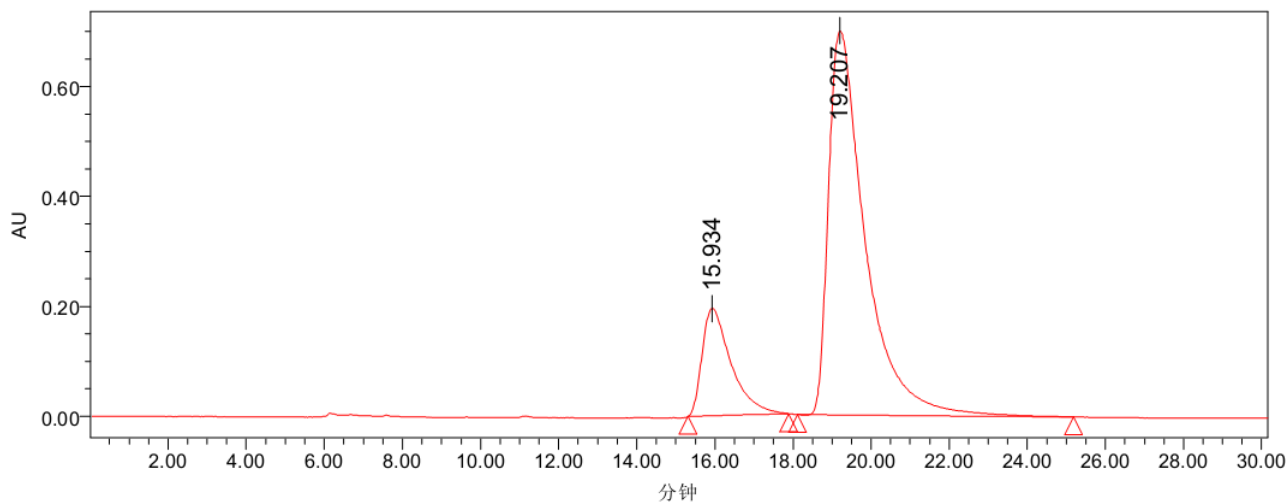

处理通道: PDA 237.9 纳米

|   | 处理通道         | 保留时间 (分钟) | 面积       | % 面积  | 峰高     |
|---|--------------|-----------|----------|-------|--------|
| 1 | PDA 237.9 纳米 | 15.934    | 10061404 | 18.05 | 194948 |
| 2 | PDA 237.9 纳米 | 19.207    | 45676134 | 81.95 | 699301 |

Processing channel: PDA 237.9nm

|   | Processing channel | Retention time (minute) | Area     | Area % | Peak height |
|---|--------------------|-------------------------|----------|--------|-------------|
| 1 | PDA 237.9nm        | 15.934                  | 10061404 | 18.05  | 194948      |
| 2 | PDA 237.9nm        | 19.207                  | 45676134 | 81.95  | 699301      |

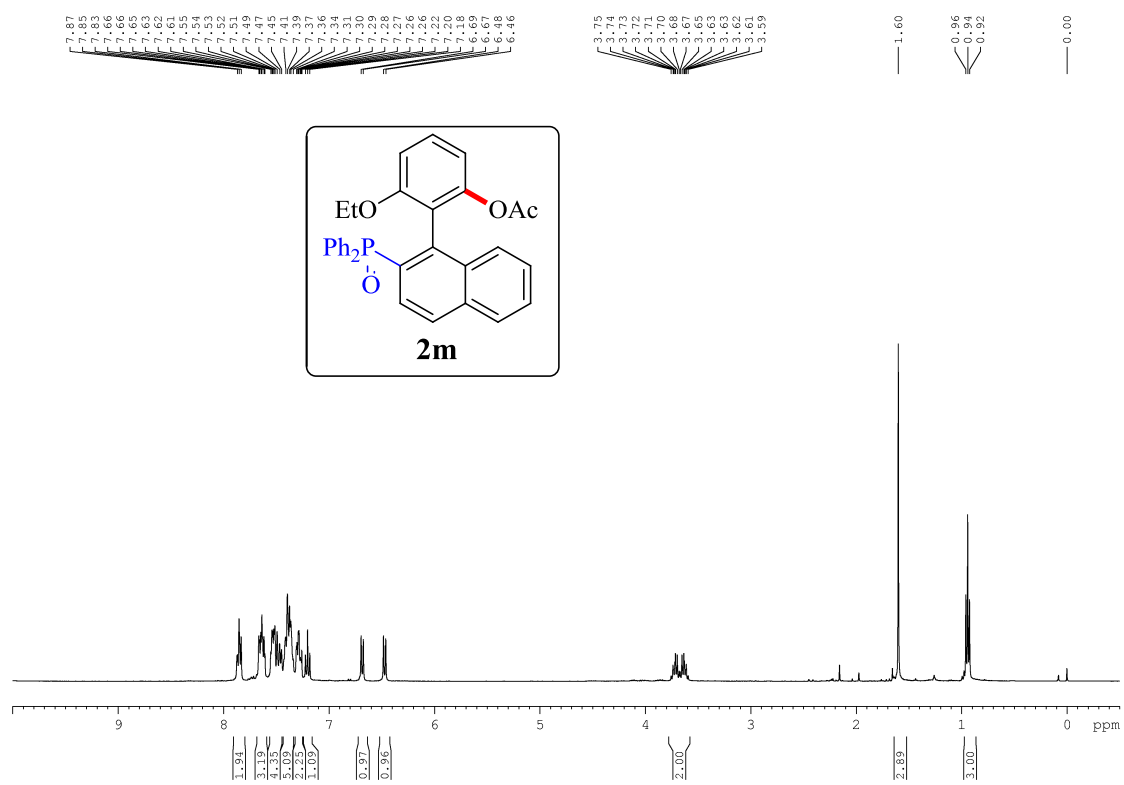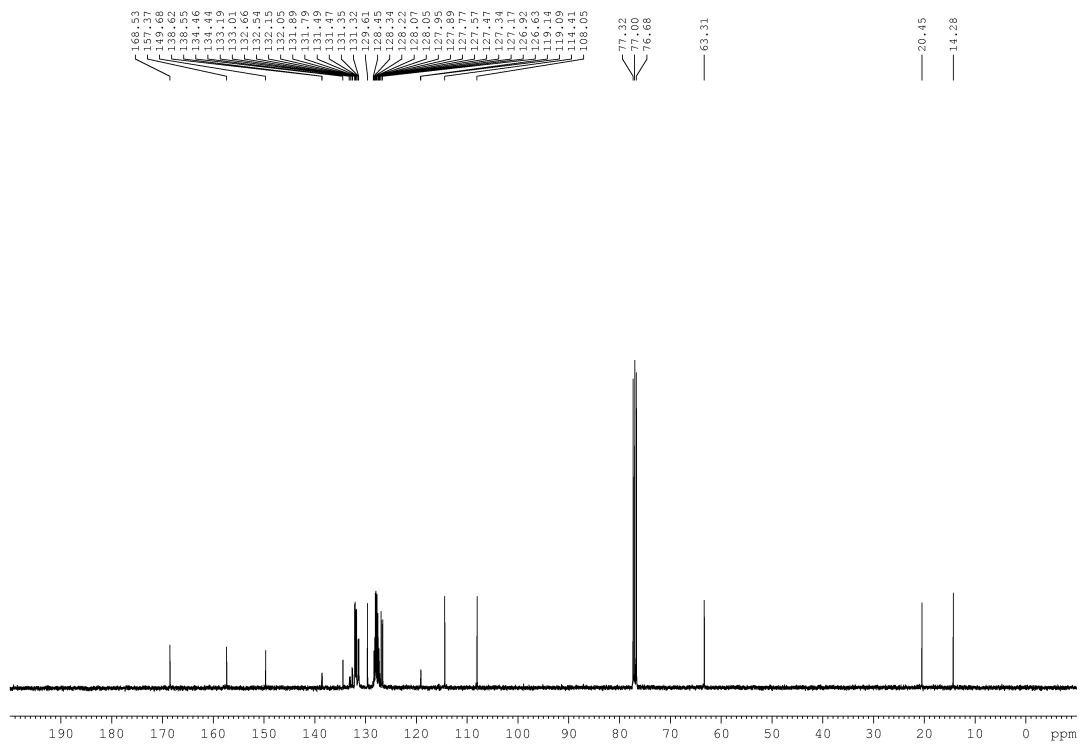

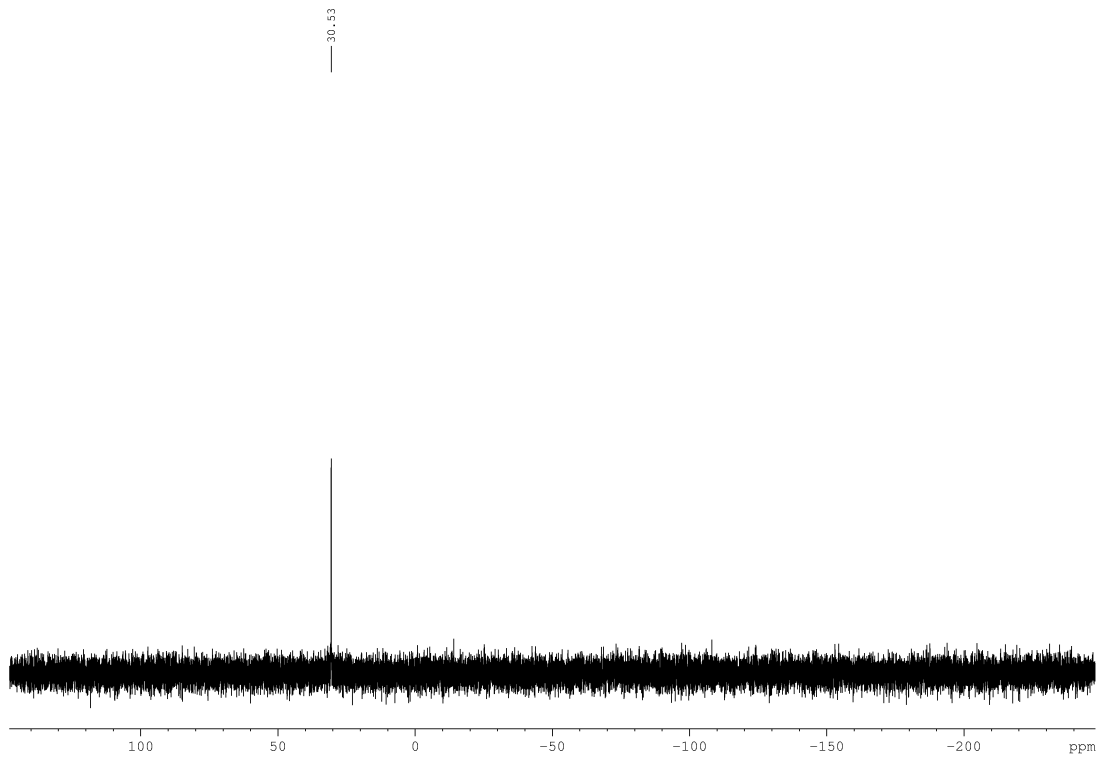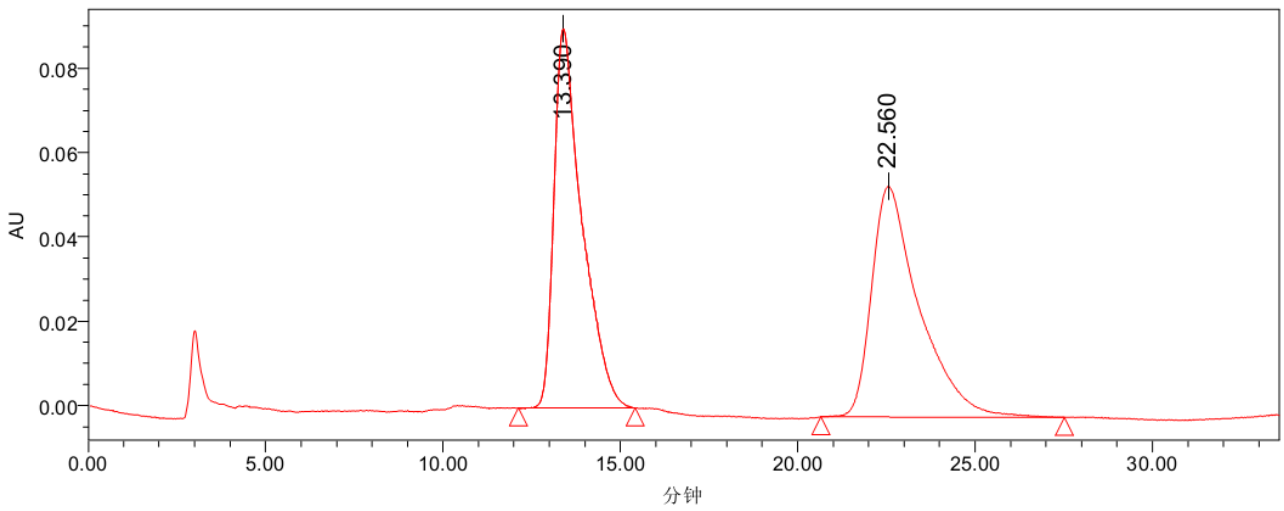

处理通道: **PDA 236.7 纳米**

|   | 处理通道         | 保留时间<br>(分钟) | 面积      | % 面积  | 峰高    |
|---|--------------|--------------|---------|-------|-------|
| 1 | PDA 236.7 纳米 | 13.390       | 4914848 | 49.13 | 89950 |
| 2 | PDA 236.7 纳米 | 22.560       | 5088822 | 50.87 | 54735 |



Processing channel: PDA 236.7nm

|   | Processing channel | Retention time (minute) | Area    | Area % | Peak height |
|---|--------------------|-------------------------|---------|--------|-------------|
| 1 | PDA 236.7nm        | 13.390                  | 4914848 | 49.13  | 89950       |
| 2 | PDA 236.7nm        | 22.560                  | 5088822 | 50.87  | 54735       |

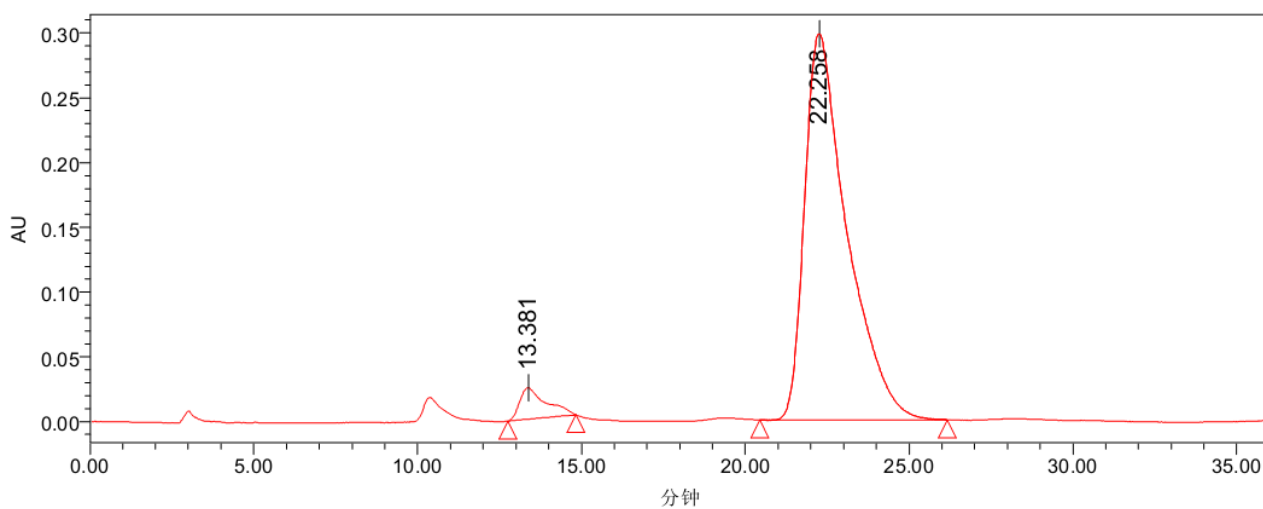

处理通道: PDA 236.7 纳米

|   | 处理通道         | 保留时间 (分钟) | 面积       | % 面积  | 峰高     |
|---|--------------|-----------|----------|-------|--------|
| 1 | PDA 236.7 纳米 | 13.381    | 1353855  | 4.80  | 24141  |
| 2 | PDA 236.7 纳米 | 22.258    | 26825678 | 95.20 | 298324 |

Processing channel: PDA 236.7nm

|   | Processing channel | Retention time (minute) | Area     | Area % | Peak height |
|---|--------------------|-------------------------|----------|--------|-------------|
| 1 | PDA 236.7nm        | 13.381                  | 1353855  | 4.80   | 24141       |
| 2 | PDA 236.7nm        | 22.258                  | 26825678 | 95.20  | 298324      |

8.05  
8.04  
8.03  
8.02  
7.96  
7.94  
7.88  
7.85  
7.81  
7.79  
7.55  
7.53  
7.51  
7.41  
7.41  
7.40  
7.36  
7.36  
7.34  
7.32  
7.32  
7.25  
7.23  
7.21  
7.20  
7.19  
7.18  
7.16  
7.15  
7.12  
7.10  
7.04  
7.02  
7.00  
7.00  
6.99  
6.97  
6.24  
6.21

4.13  
4.11  
4.07

2.63

1.23  
1.22  
1.20

0.00

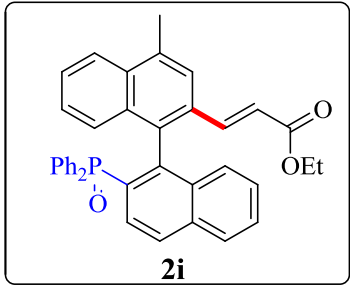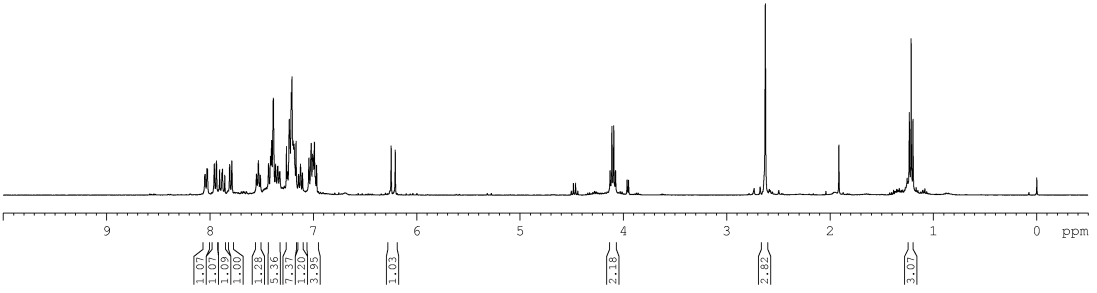

166.55  
142.87  
141.32  
141.23  
135.39  
135.14  
134.57  
133.75  
133.39  
133.28  
132.86  
132.70  
131.84  
131.74  
131.66  
131.45  
131.35  
131.21  
131.13  
131.13  
130.38  
130.35  
129.01  
128.91  
128.80  
128.33  
128.21  
128.15  
128.15  
128.09  
127.94  
127.77  
127.37  
127.28  
127.25  
127.17  
127.17  
126.13  
123.80  
122.81  
122.81  
77.32  
77.00  
76.68

60.10

19.62

14.19

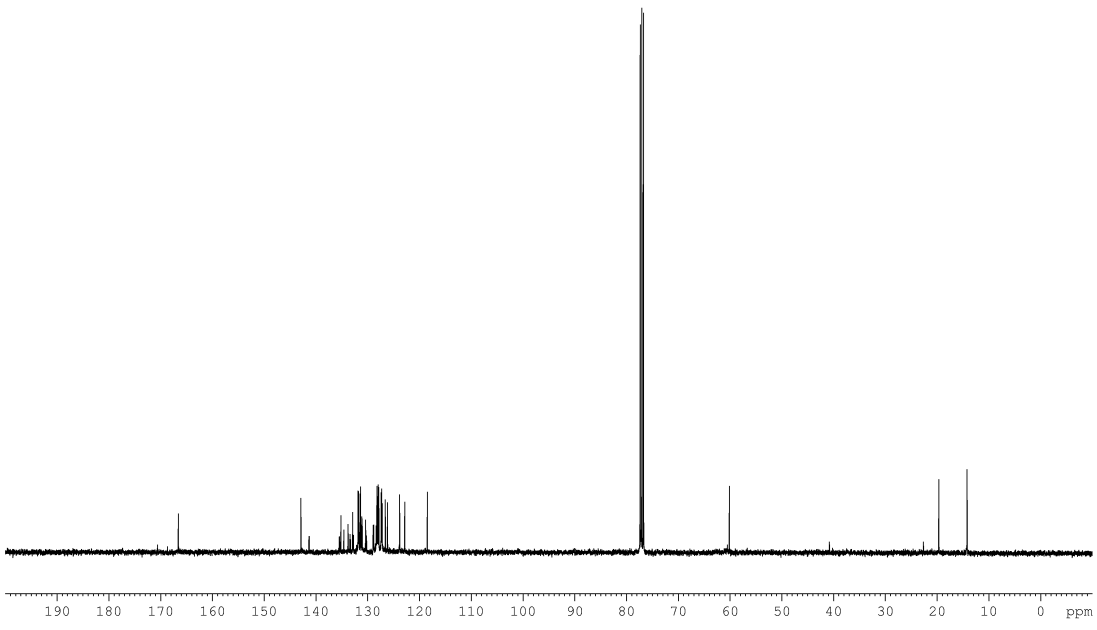

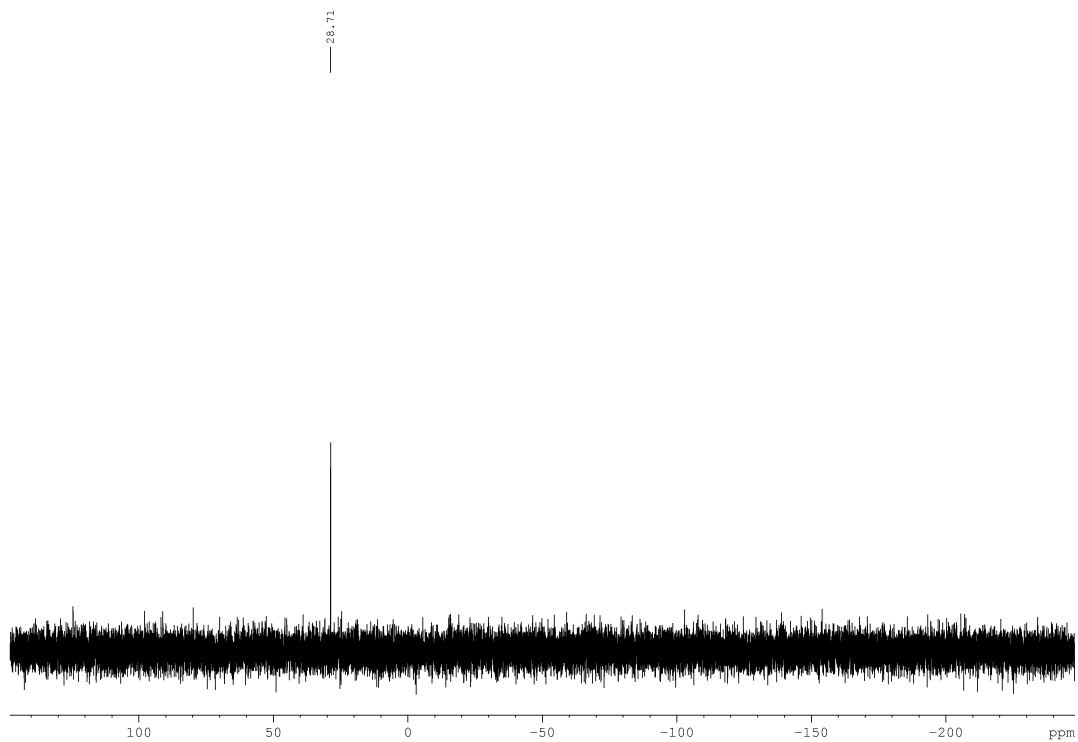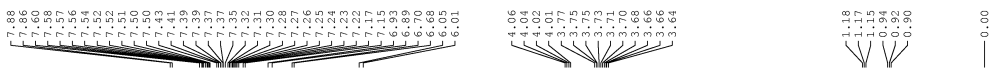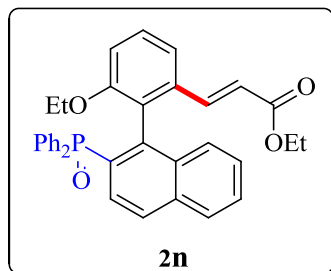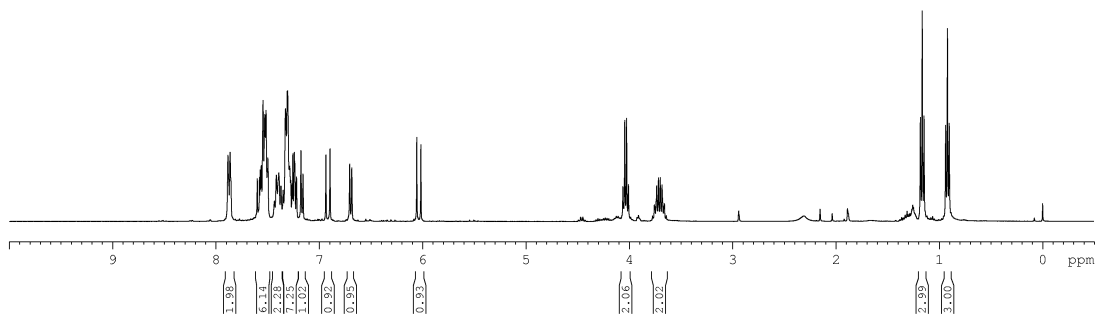

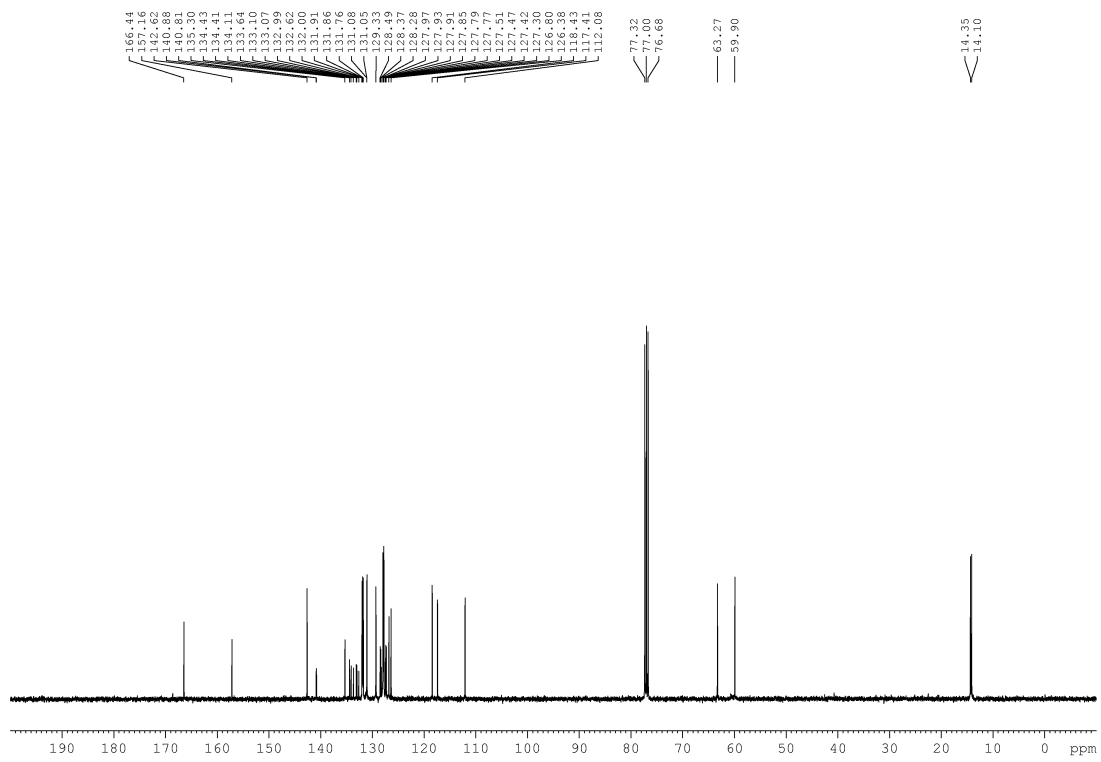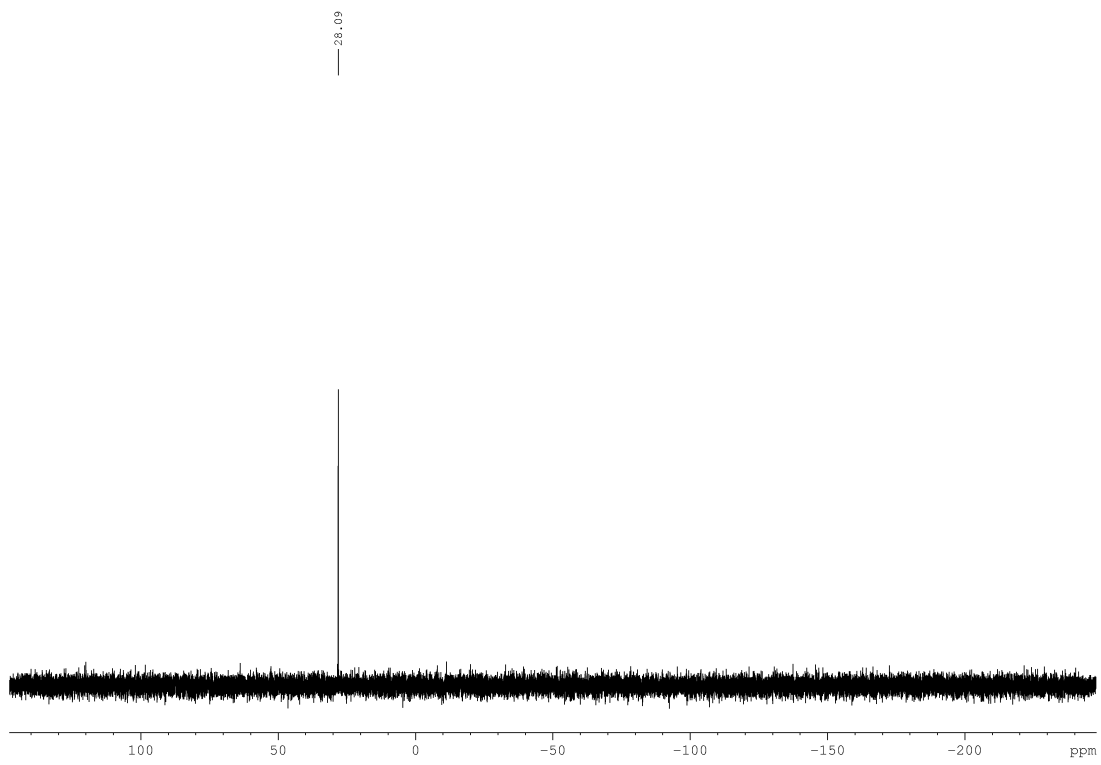

DAD1 B, Sig=240,4 Ref=360,100 (HURBIHURB20140618-OET-MIX-2 2014-06-18 18-15-12.D)

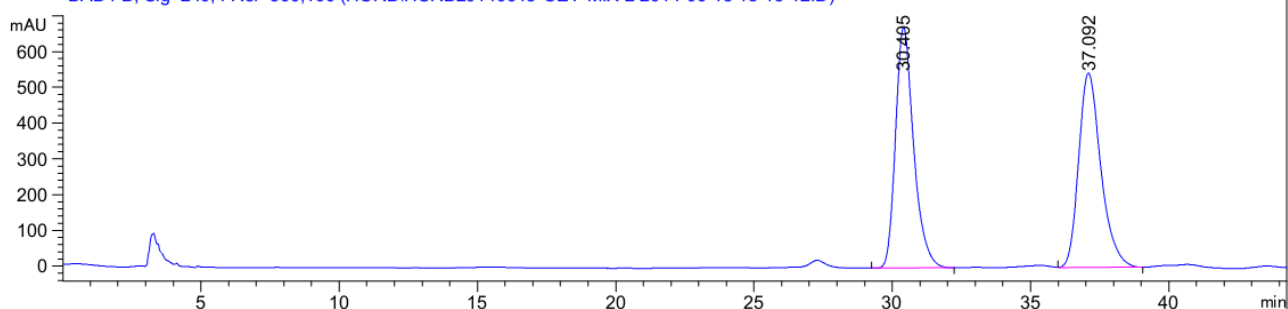

| 峰 # | 保留时间 [min] | 类型 | 峰宽 [min] | 峰面积 [mAU*s] | 峰高 [mAU]  | 峰面积 %   |
|-----|------------|----|----------|-------------|-----------|---------|
| 1   | 30.405     | BB | 0.6932   | 3.06682e4   | 673.51056 | 50.2668 |
| 2   | 37.092     | VB | 0.8535   | 3.03427e4   | 543.38837 | 49.7332 |

DAD1 B, Sig=240,4 Ref=360,100 (SNAPSHOT.D)

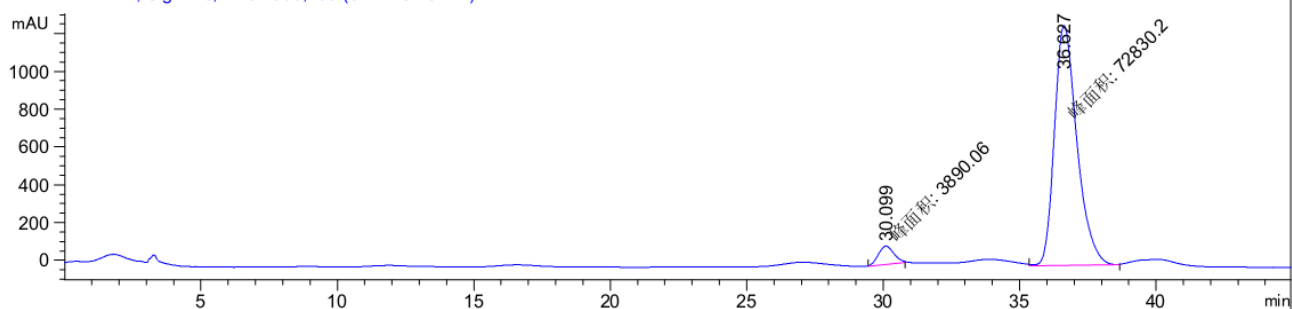

| 峰 # | 保留时间 [min] | 类型 | 峰宽 [min] | 峰面积 [mAU*s] | 峰高 [mAU]   | 峰面积 %   |
|-----|------------|----|----------|-------------|------------|---------|
| 1   | 30.099     | MM | 0.6683   | 3890.06152  | 97.00778   | 5.0705  |
| 2   | 36.627     | MM | 0.9569   | 7.28302e4   | 1268.47192 | 94.9295 |
